# Supplementary material for: A base-mediated aerobic oxidative synthesis of cyclopent-2-enol derivatives from doubly activated cyclopropanes and substituted acetonitriles
Source: Royal Society of Chemistry journal article supplement (doi:10.1039/d1ob02155a), 2022-01-01
Supplement: d1ob02155a1.pdf [file d1ob02155a1.pdf]

## Supporting Information

### A base-mediated aerobic oxidative synthesis of cyclopent-2-enols derivatives from doubly activated cyclopropanes and substituted acetonitriles

Xiao-Dan Han<sup>1</sup>, Gao-Liang Peng<sup>2</sup>, Wei Xiong<sup>1</sup>, Ran Gan<sup>3</sup>, Jian-Ping Fu<sup>1</sup>, Lei Wu<sup>1</sup>, Zhong-Sheng Tang<sup>1</sup>, Ju-Wu Hu<sup>1\*</sup>, Hui-Bin Wang<sup>1\*</sup>

1) Department of Applied Chemistry, Jiang Xi Academy of Sciences, Nanchang, 330096, China

2) Jiangxi university of Applied Science, Nanchang, 330100, China

3) Jiangxi Academy of Forestry, Nanchang, 330096, China

email: [hjw19771985@163.com](mailto:hjw19771985@163.com); [wanghb19801985@sina.com](mailto:wanghb19801985@sina.com)

#### I. Crystal data and ORTEP drawing of compounds **3c**, **6b** and **8f**

Crystal data for **3c**: C<sub>16</sub>H<sub>20</sub>N<sub>2</sub>O<sub>5</sub>, H<sub>2</sub>O: 338.35, colorless crystal, monoclinic, P 2<sub>1</sub>/n,  $a = 12.2878(18)\text{Å}$ ,  $b = 7.4046(10)\text{Å}$ ,  $c = 19.762(3)\text{Å}$ ,  $\alpha = 90.0^\circ$ ,  $\beta = 102.091(2)^\circ$ ,  $\gamma = 90.0^\circ$ ,  $V = 1758.2(4)\text{Å}^3$ ,  $Z = 4$ ,  $T = 296\text{K}$ ,  $F_{000} = 720.0$ ,  $R_1 = 0.0778(2351)$ ,  $wR_2 = 0.2531(3996)$ . CCDC 2044495.

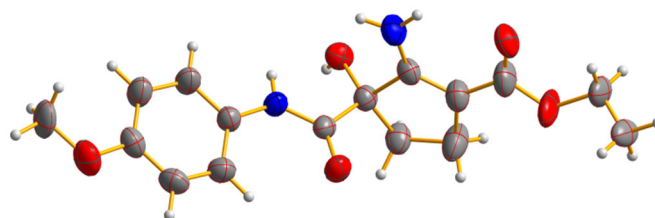

Compound **3c**

Crystal data for **6b**: C<sub>18</sub>H<sub>20</sub>N<sub>2</sub>O<sub>2</sub>, colorless crystal,  $M = 296.36$ , monoclinic, C 2/c,  $a = 18.7762(7)\text{Å}$ ,  $b = 8.0291(2)\text{Å}$ ,  $c = 23.0370(8)\text{Å}$ ,  $\alpha = 90.0^\circ$ ,  $\beta = 112.850^\circ$ ,  $\gamma = 90.0^\circ$ ,  $V = 3200.4(2)\text{Å}^3$ ,  $Z = 8$ ,  $T = 240\text{K}$ ,  $F_{000} = 1264$ ,  $R_1 = 0.0372(2476)$ ,  $wR_2 = 0.1067(2806)$ . CCDC 2044497.

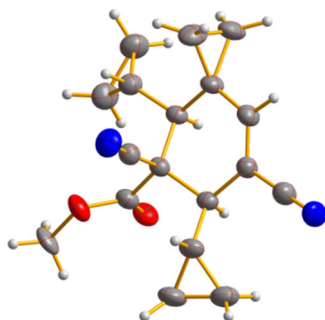

Compound **6b**

Crystal data for **8f**: C<sub>16</sub>H<sub>14</sub>Cl<sub>2</sub>N<sub>2</sub>O<sub>3</sub>, colorless crystal,  $M = 353.19$ , monoclinic, C 2/c,  $a = 33.761(16)\text{Å}$ ,  $b = 6.7432(19)\text{Å}$ ,  $c = 14.595(5)\text{Å}$ ,  $\alpha = 90.0^\circ$ ,  $\beta = 101.90(3)^\circ$ ,  $\gamma = 90.0^\circ$ ,  $V = 3251(2)\text{Å}^3$ ,  $Z = 8$ ,  $T = 250\text{K}$ ,  $F_{000} = 1456$ ,  $R_1 = 0.1106(3245)$ ,  $wR_2 = 0.2298(3832)$ . CCDC 2092194.

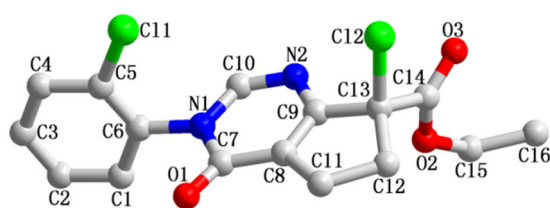

Compound **8f**

## II. Copies of $^1\text{H}$ NMR and $^{13}\text{C}$ NMR spectra of compounds **3**, **4a**, **6a-b**, **7a**, **8** (**8'**) and **9**

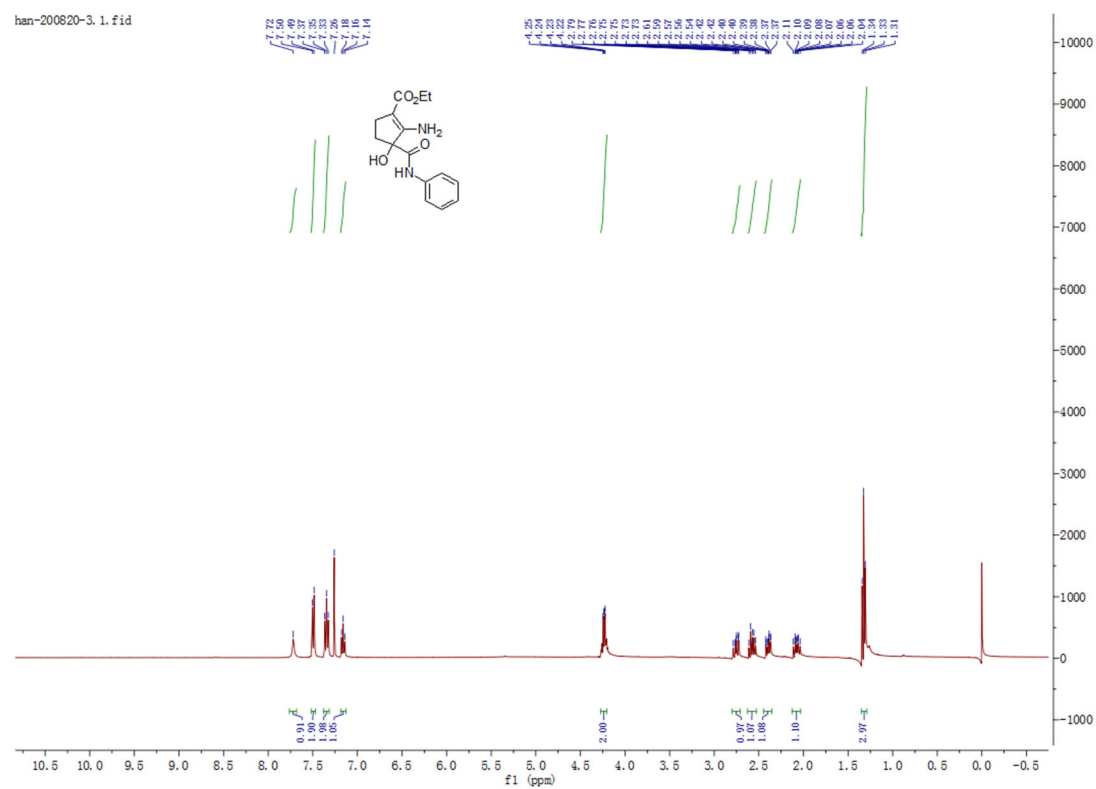



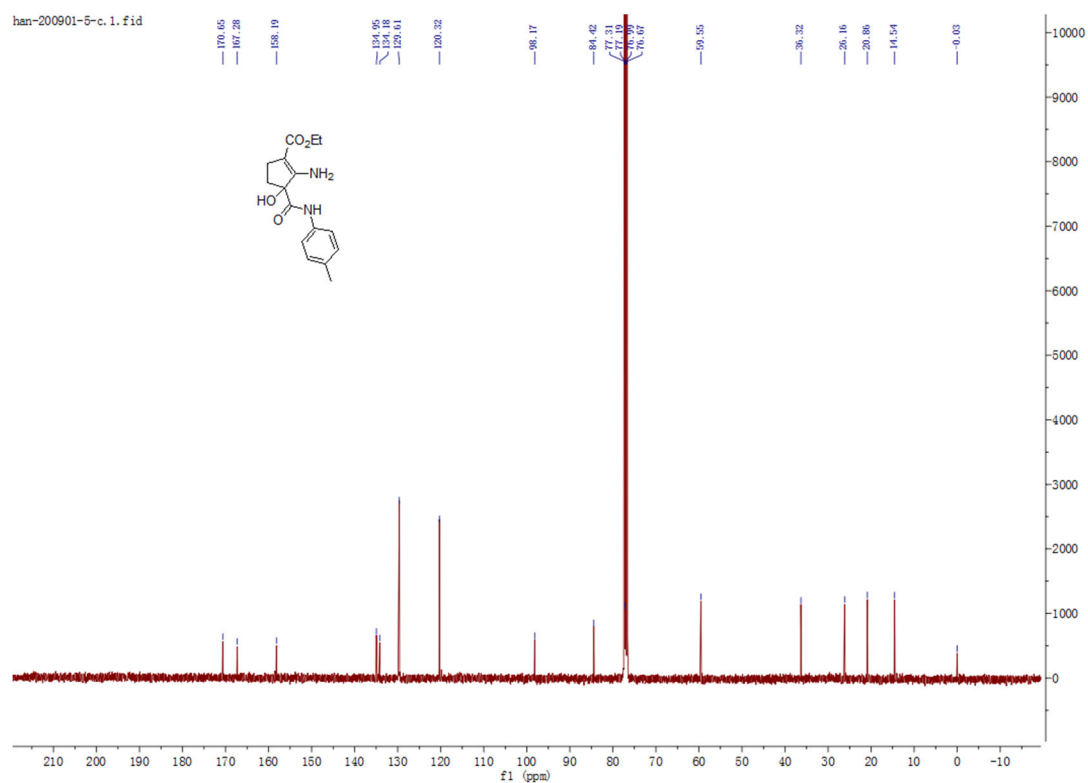

**Figure 2.**  $^1\text{H}$ -(upper) and  $^{13}\text{C}$ -NMR (lower) spectra of compound **3b**.

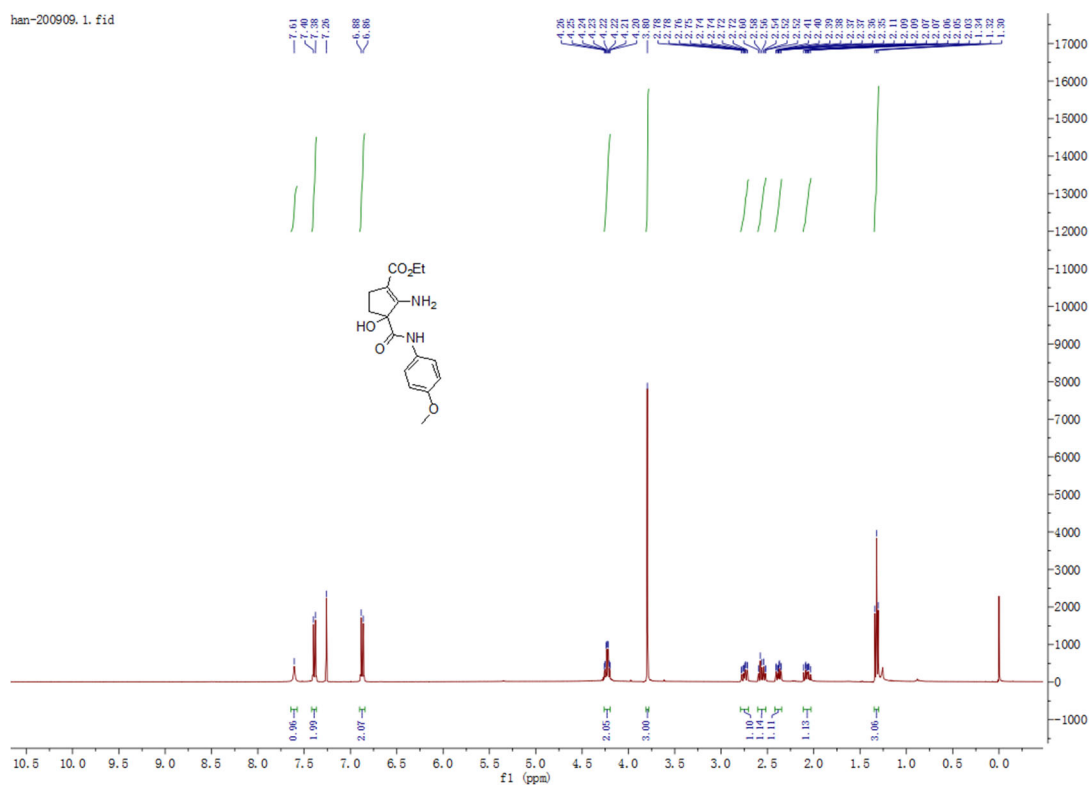

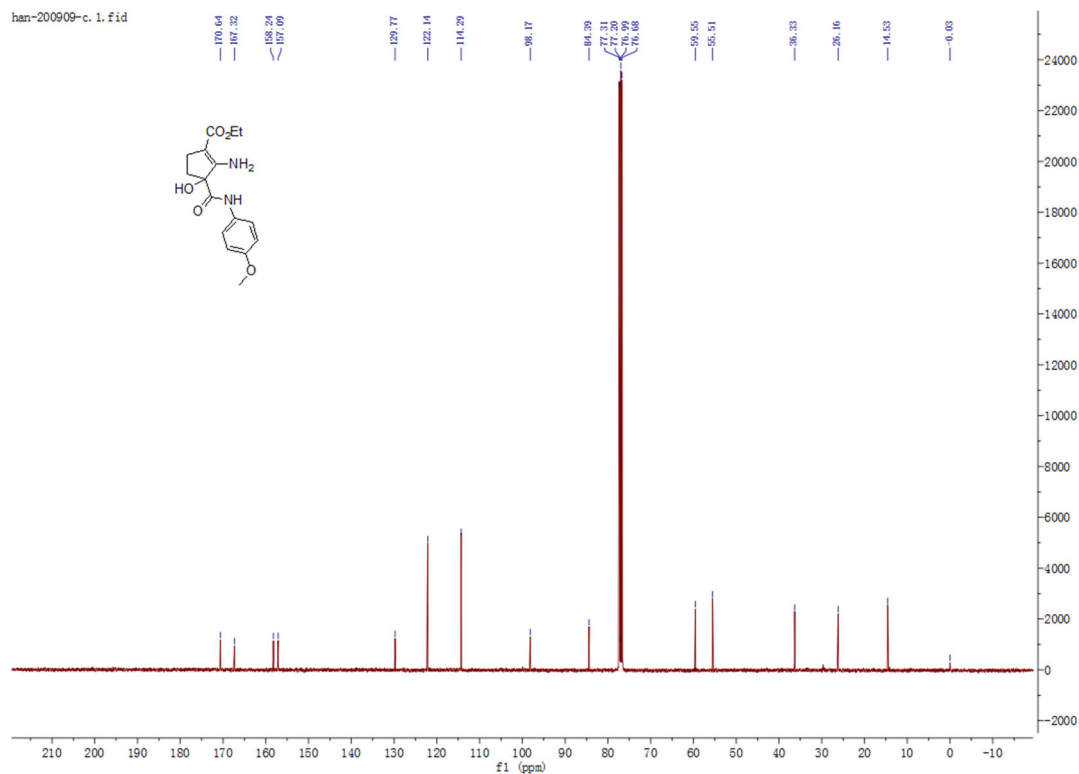

**Figure 3.**  $^1\text{H}$ -(upper) and  $^{13}\text{C}$ -NMR (lower) spectra of compound 3c.

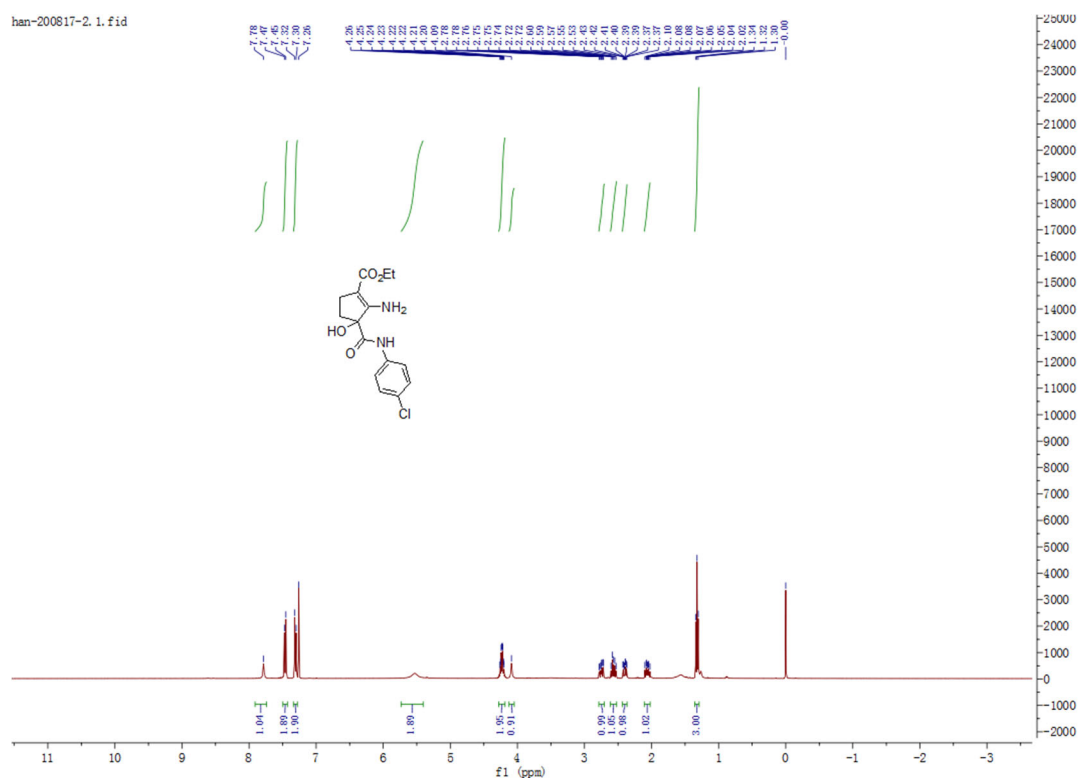

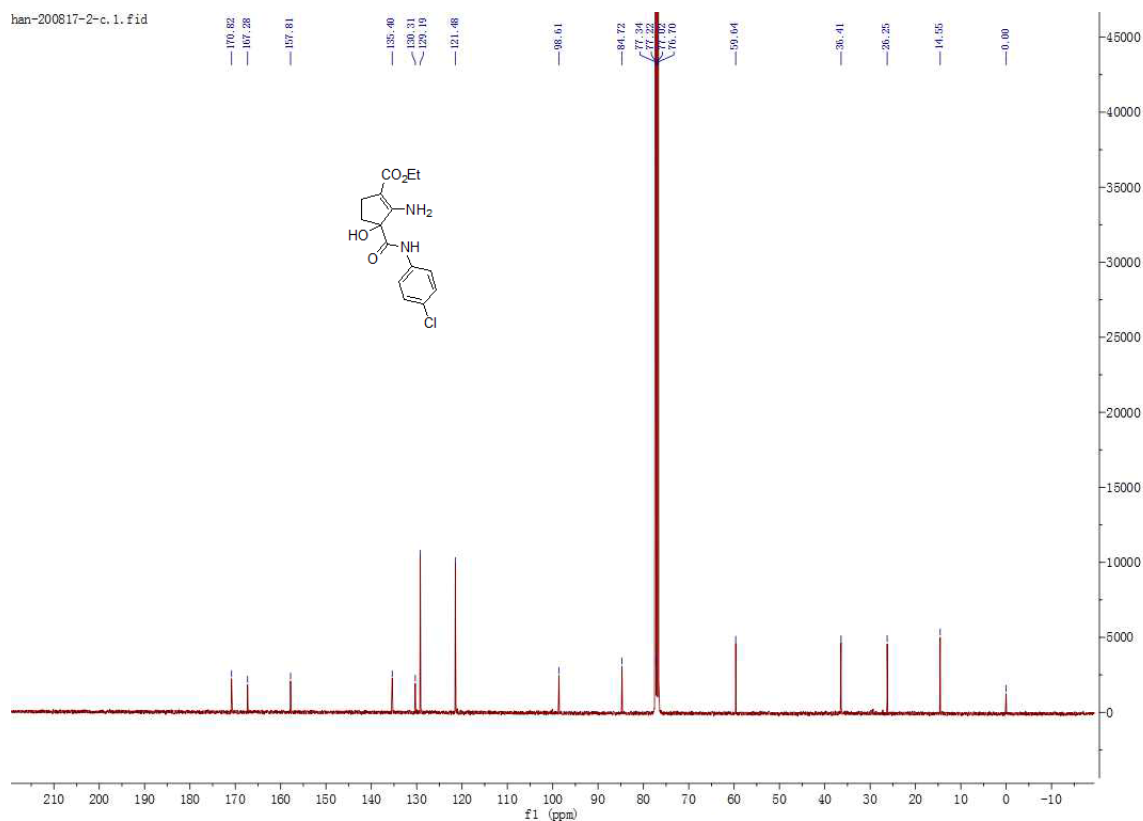

**Figure 4.**  $^1\text{H}$ -(upper) and  $^{13}\text{C}$ -NMR (lower) spectra of compound 3d.

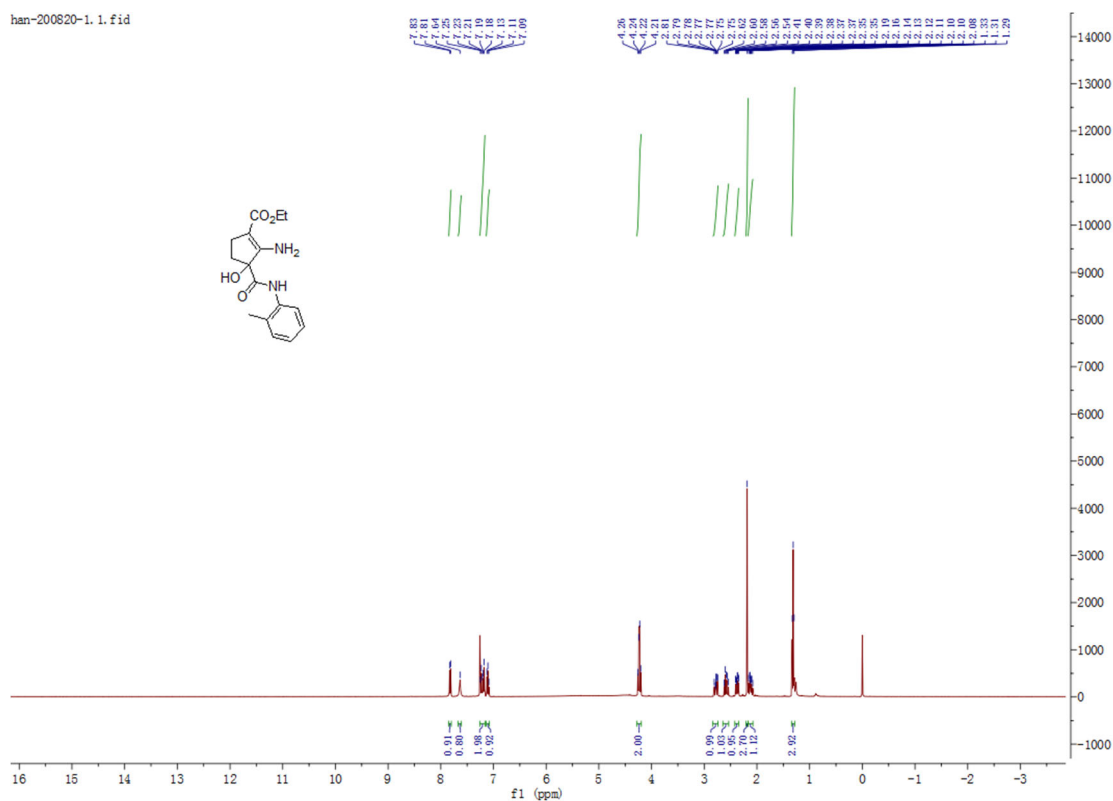







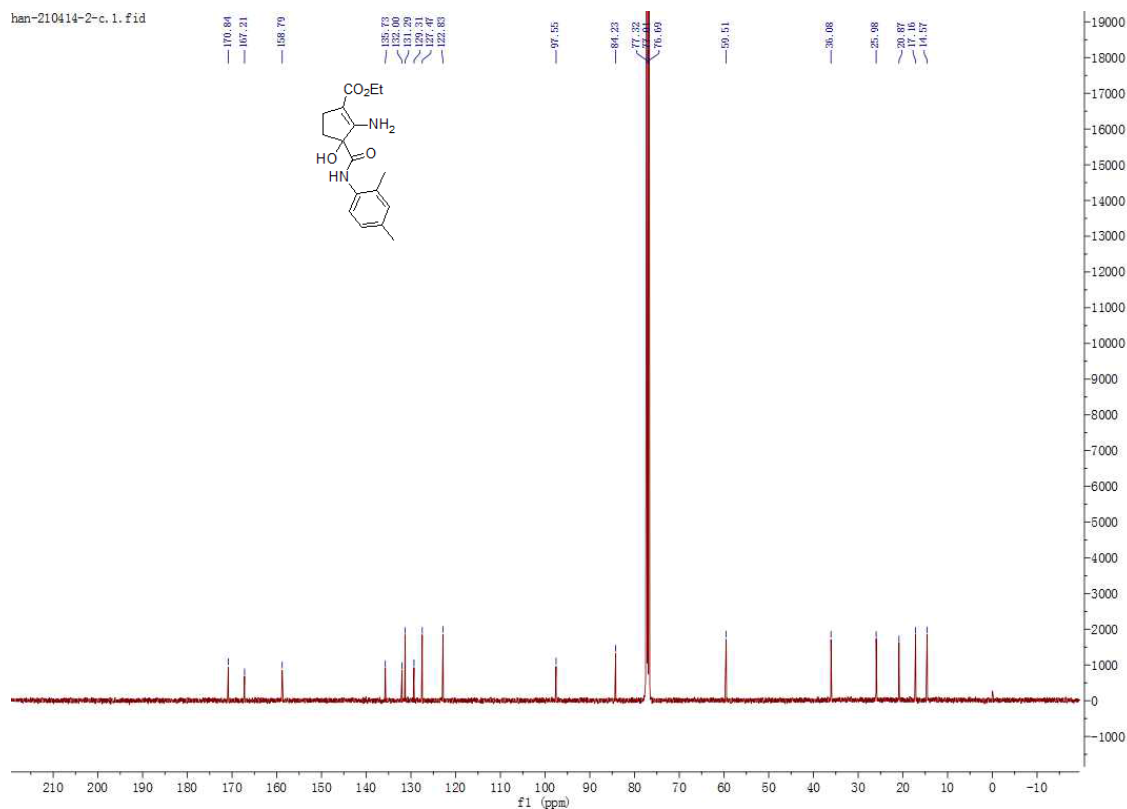

**Figure 7.** <sup>1</sup>H-(upper) and <sup>13</sup>C-NMR (lower) spectra of compound **3g**.

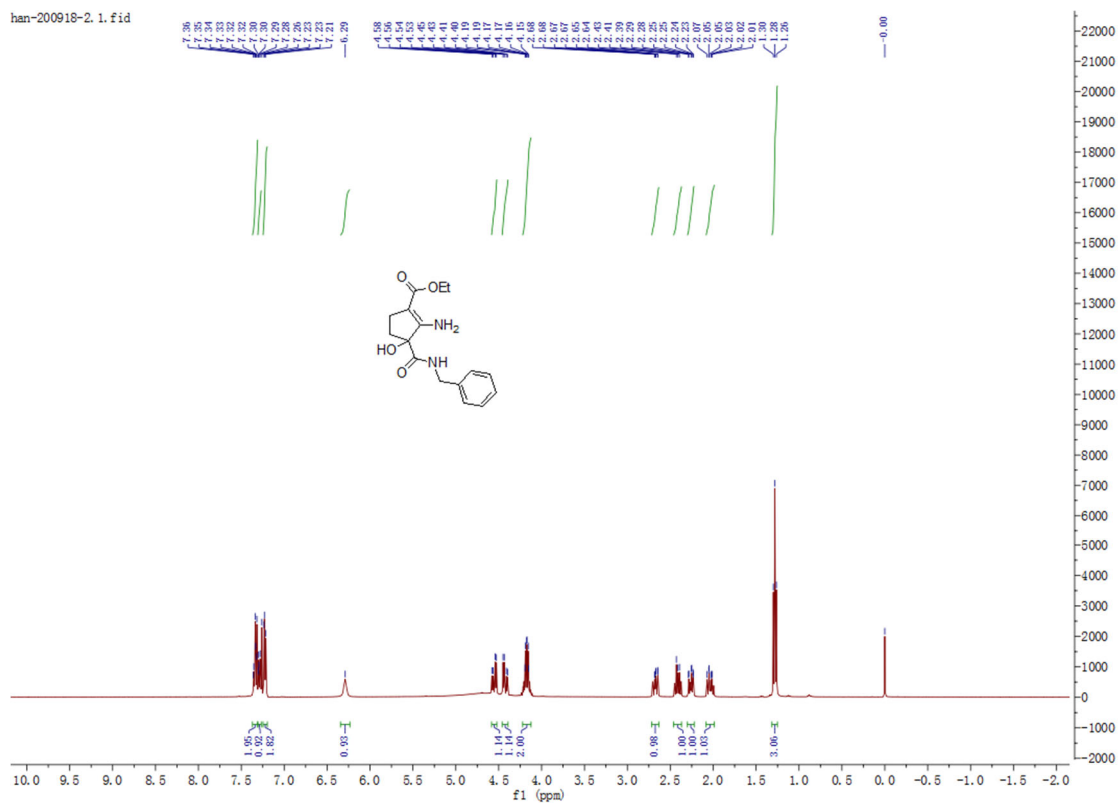

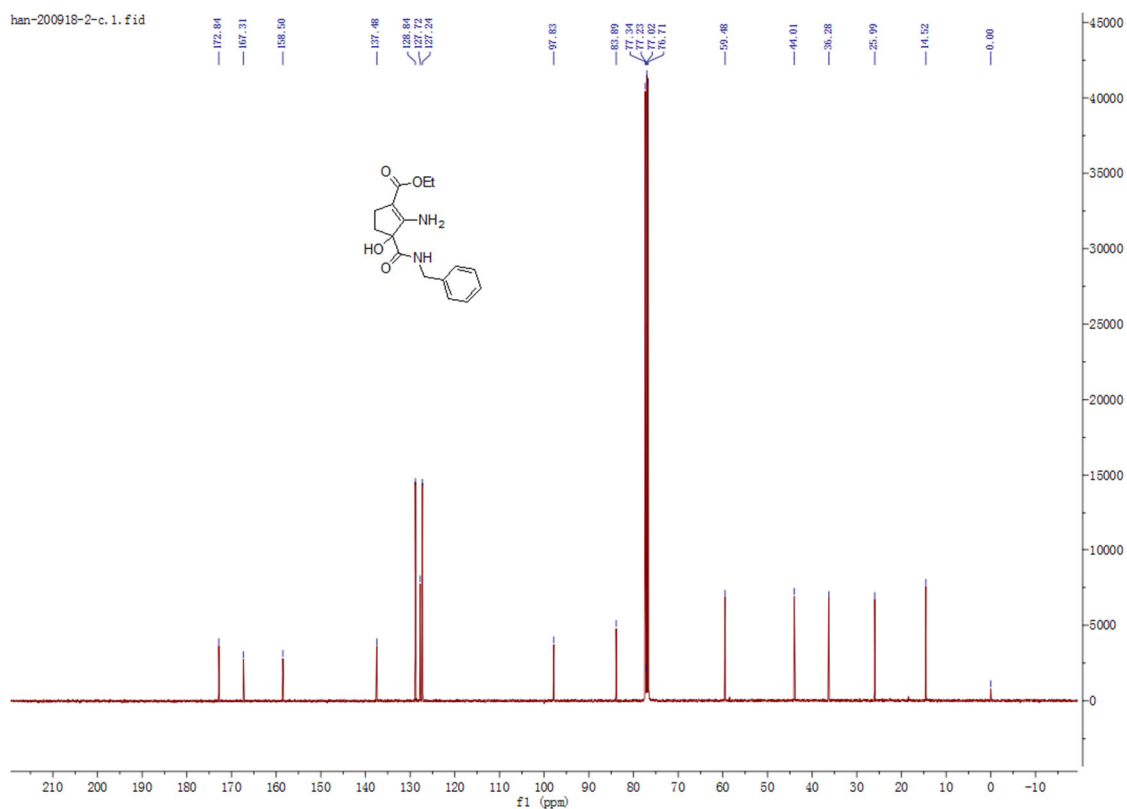

**Figure 8.** <sup>1</sup>H-(upper) and <sup>13</sup>C-NMR (lower) spectra of compound **3i**.

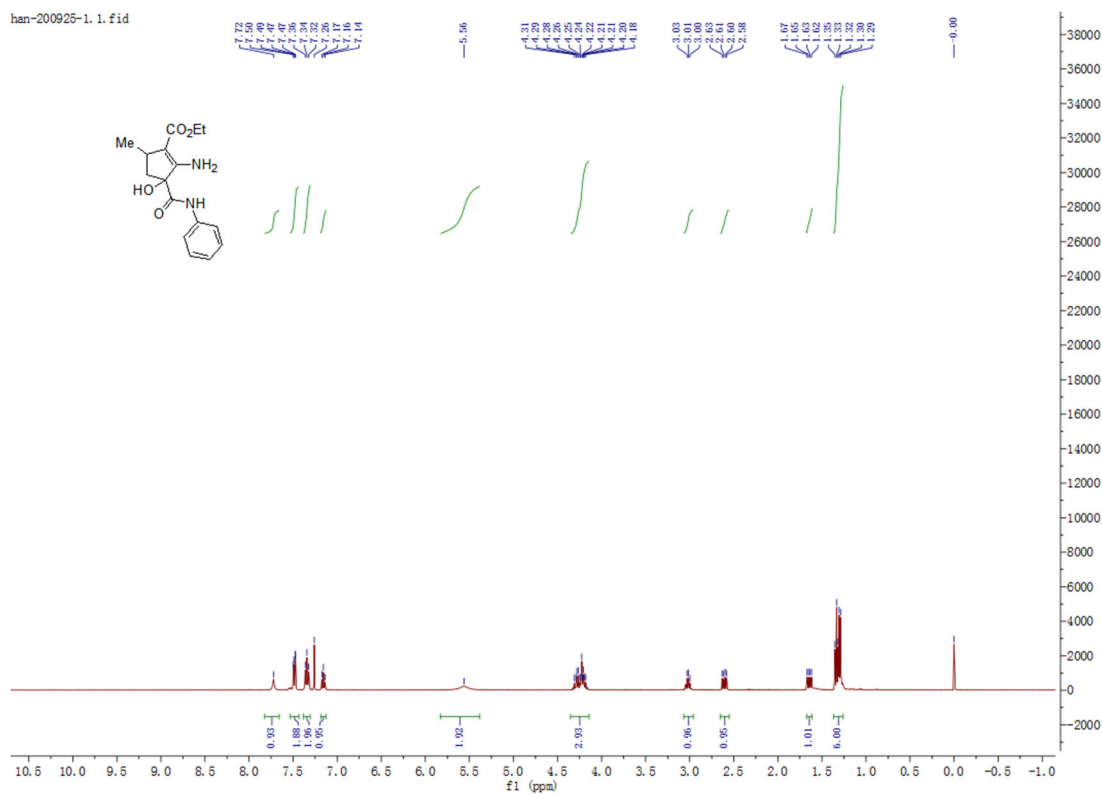

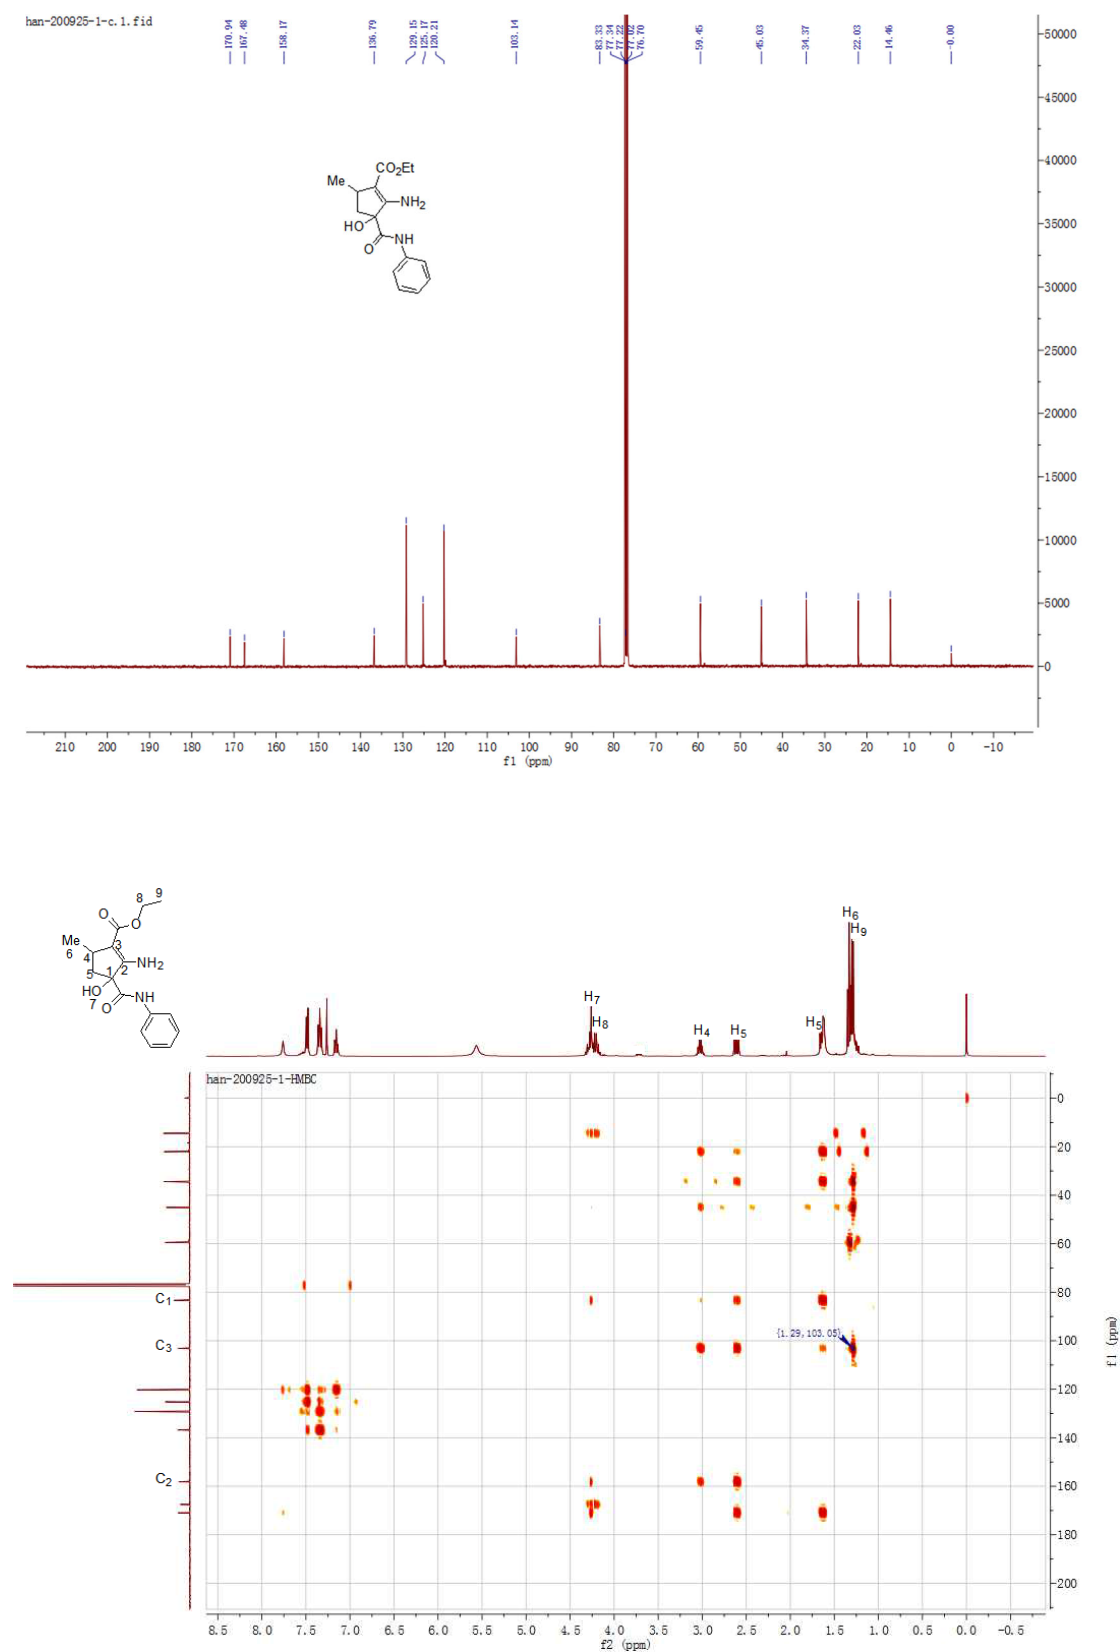

**Figure 9.**  $^1\text{H}$ -(upper),  $^{13}\text{C}$ -NMR (middle) and HMBC (lower) spectra of **3j**.

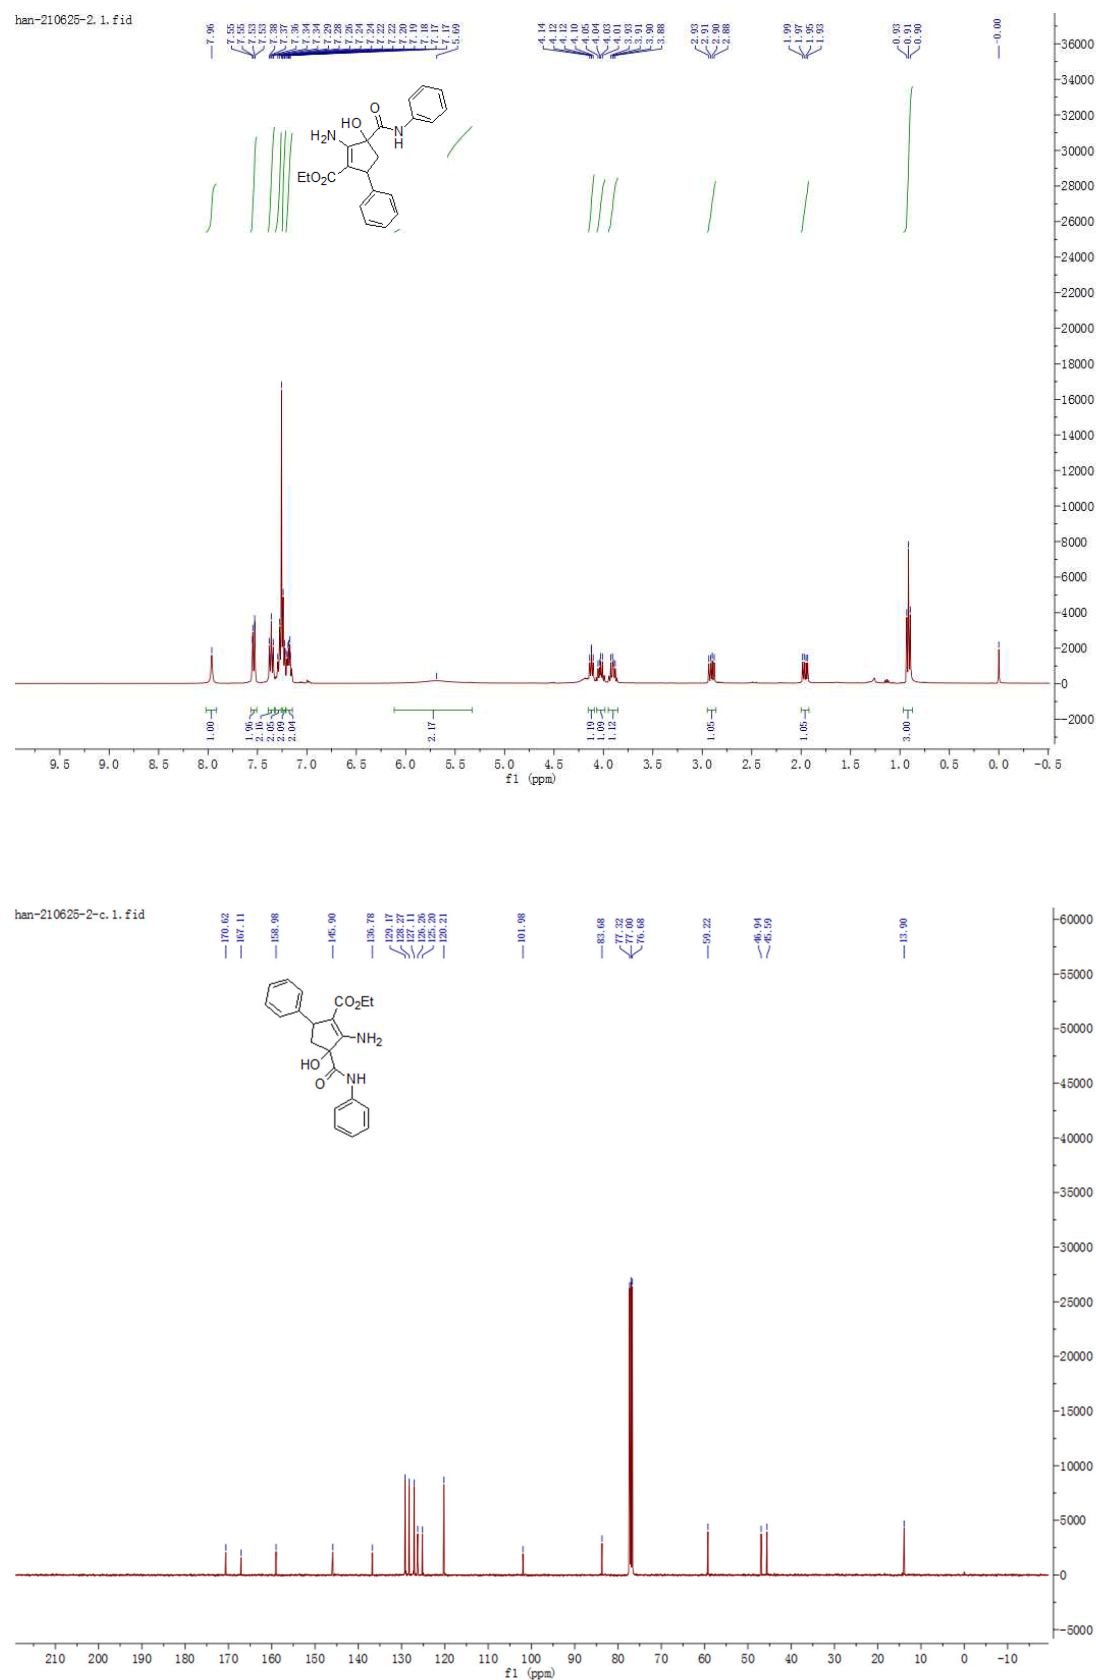

**Figure 10.**  $^1\text{H}$ -(upper) and  $^{13}\text{C}$ -NMR (lower) spectra of compound **3k**.

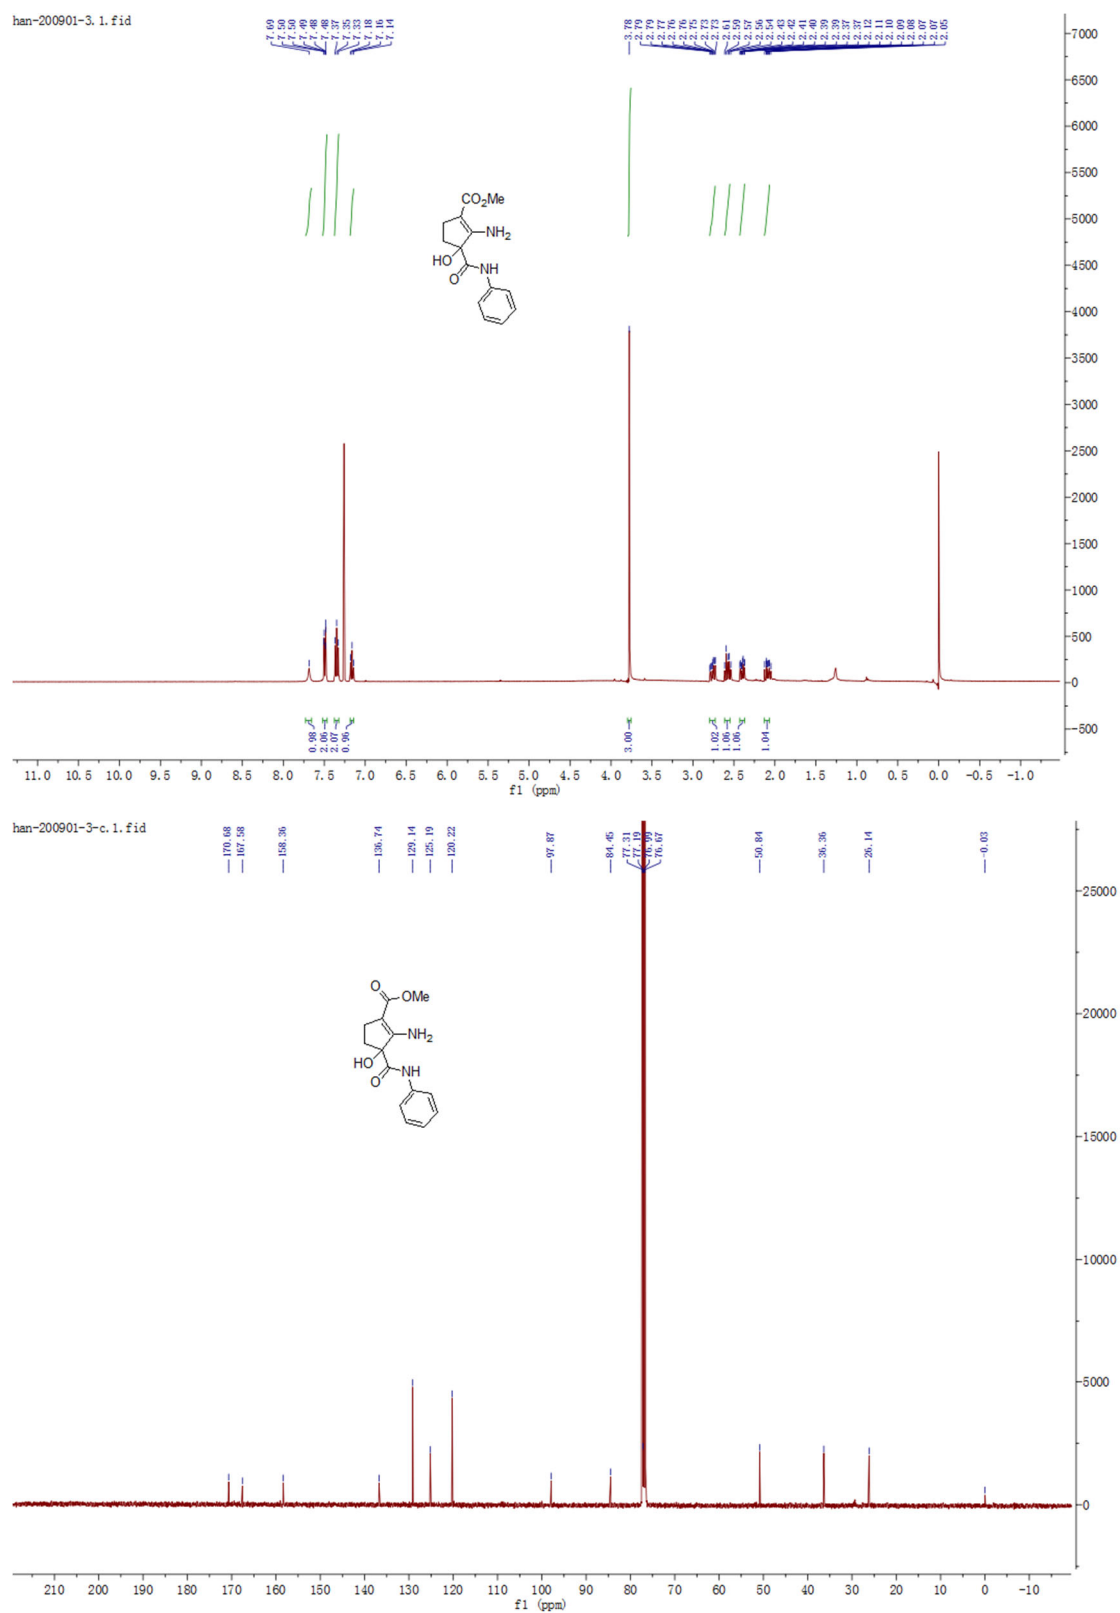

**Figure 11.**  $^1\text{H}$ -(upper) and  $^{13}\text{C}$ -NMR (lower) spectra of compound 3ab.

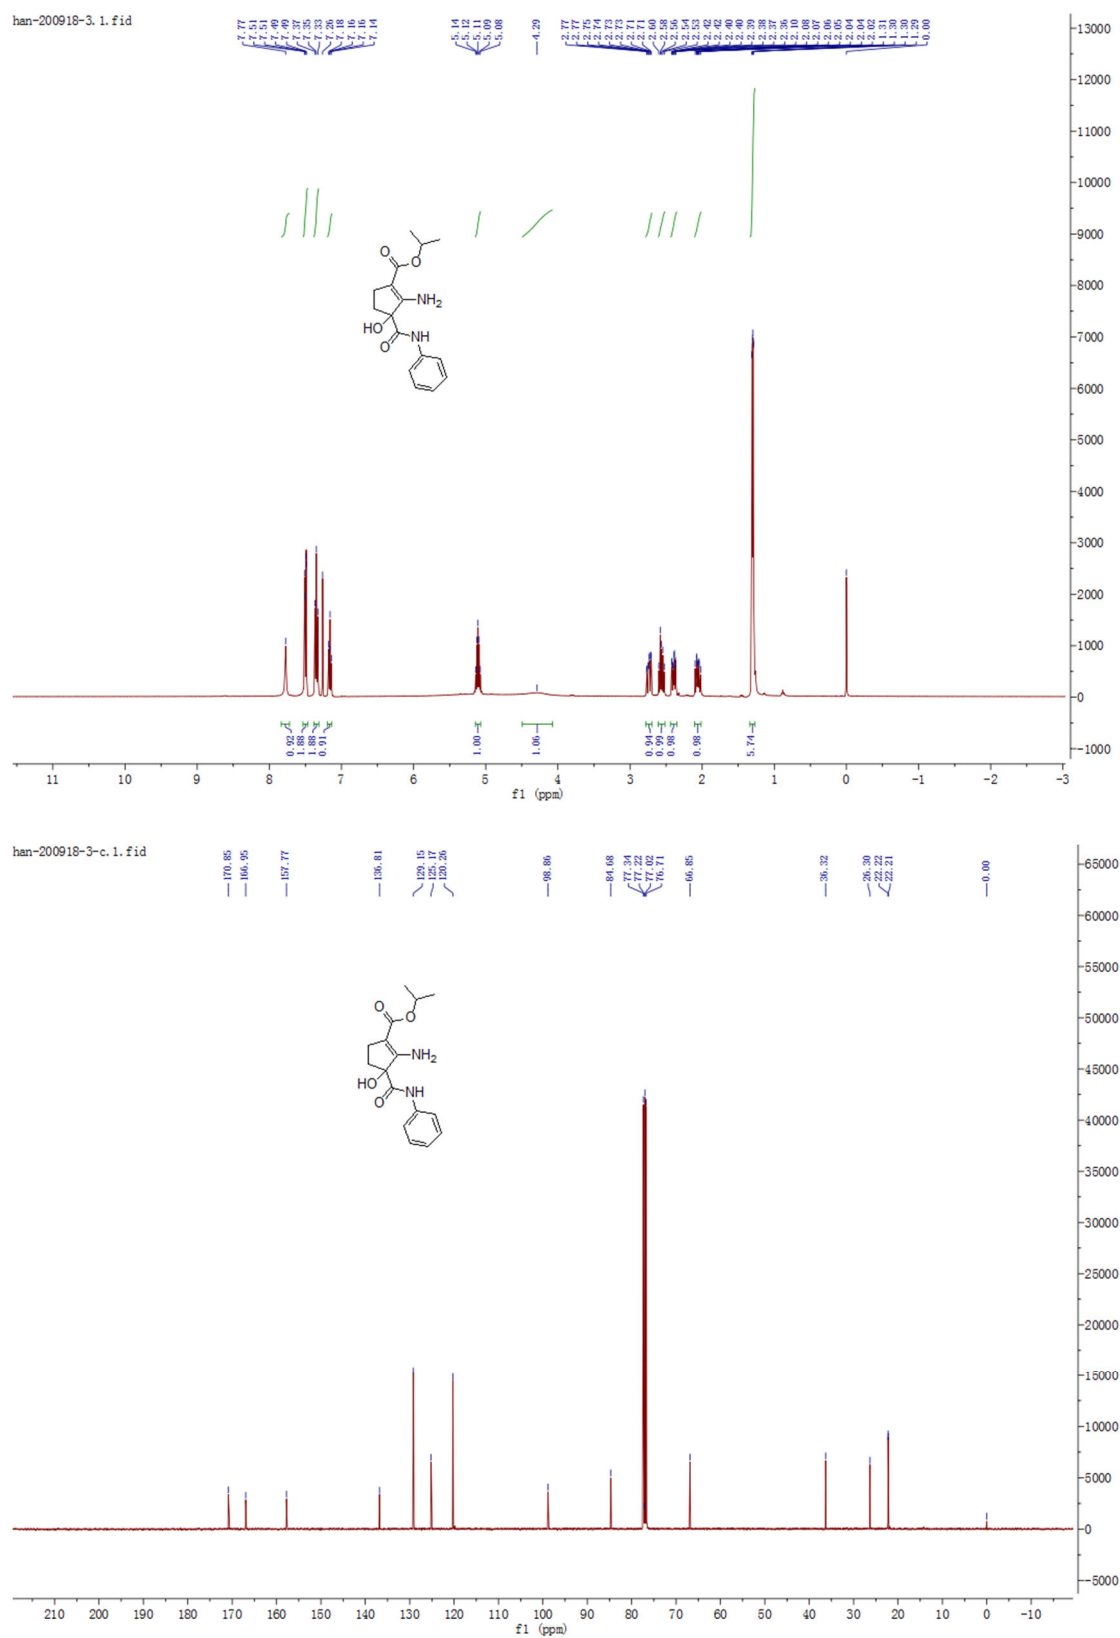

**Figure 12.**  $^1\text{H}$ -(upper) and  $^{13}\text{C}$ -NMR (lower) spectra of compound **3ac**.

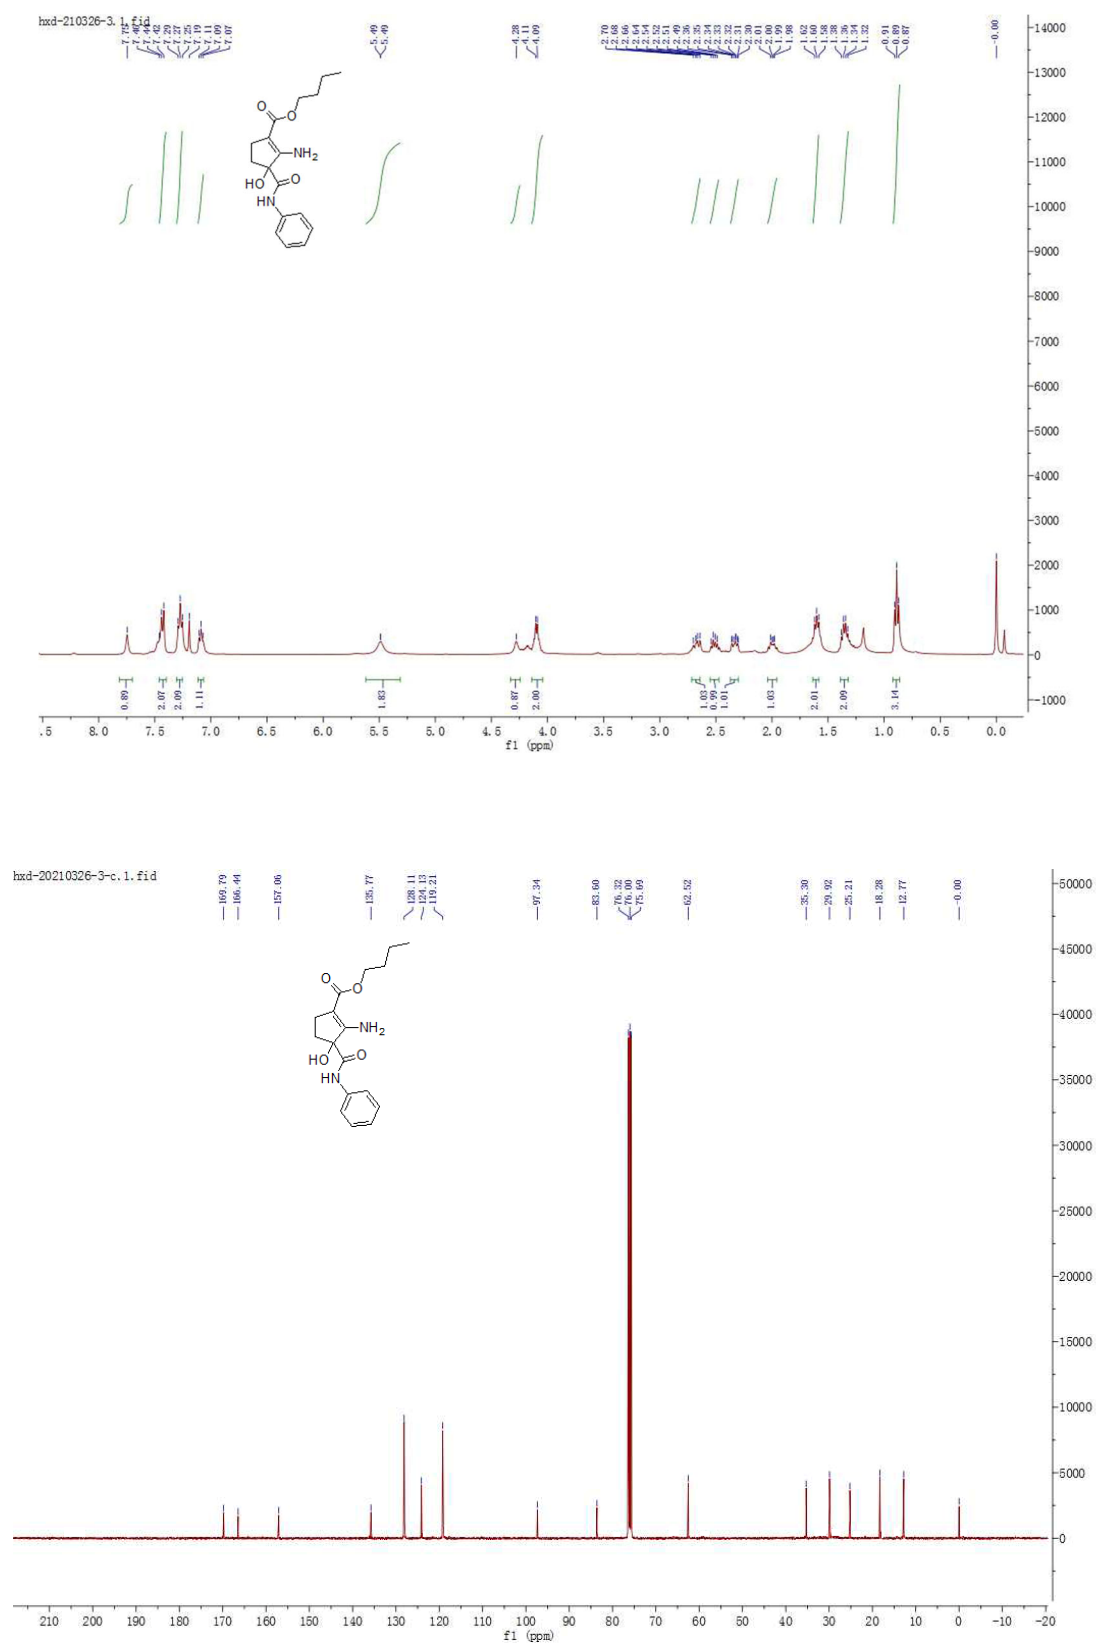

**Figure 13.**  $^1\text{H}$ -(upper) and  $^{13}\text{C}$ -NMR (lower) spectra of compound **3ad**.

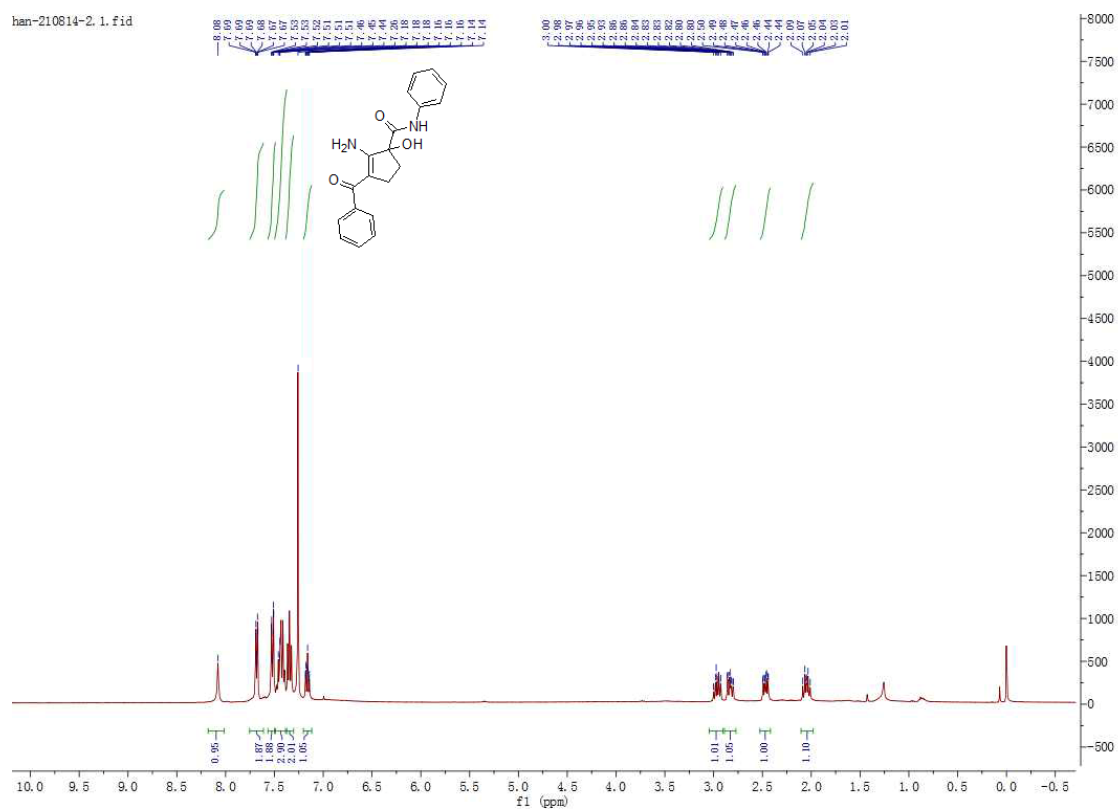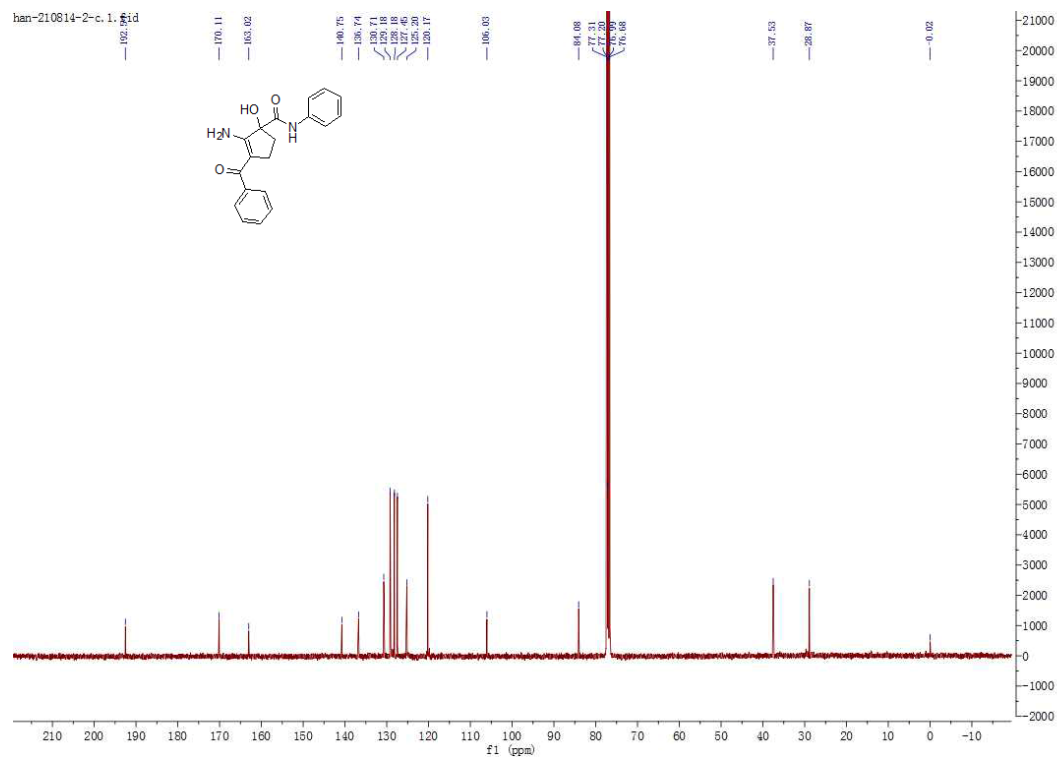

**Figure 14.**  $^1\text{H}$ -(upper) and  $^{13}\text{C}$ -NMR (lower) spectra of compound **3ae**.



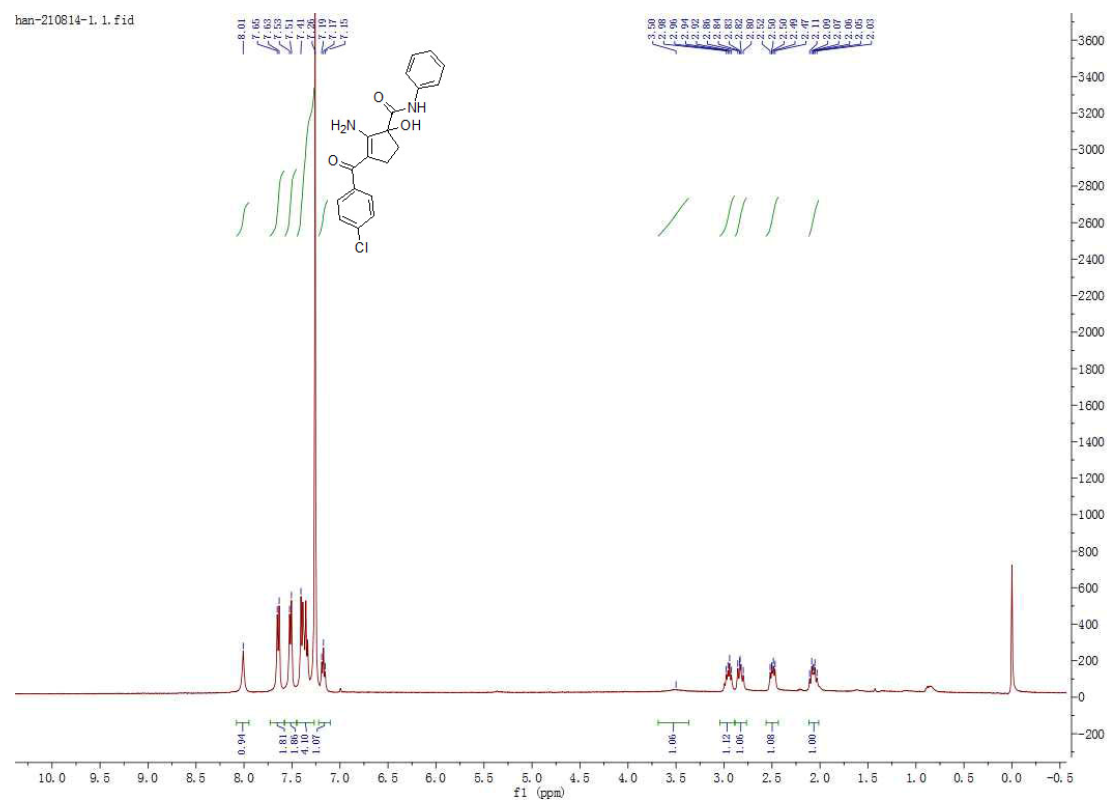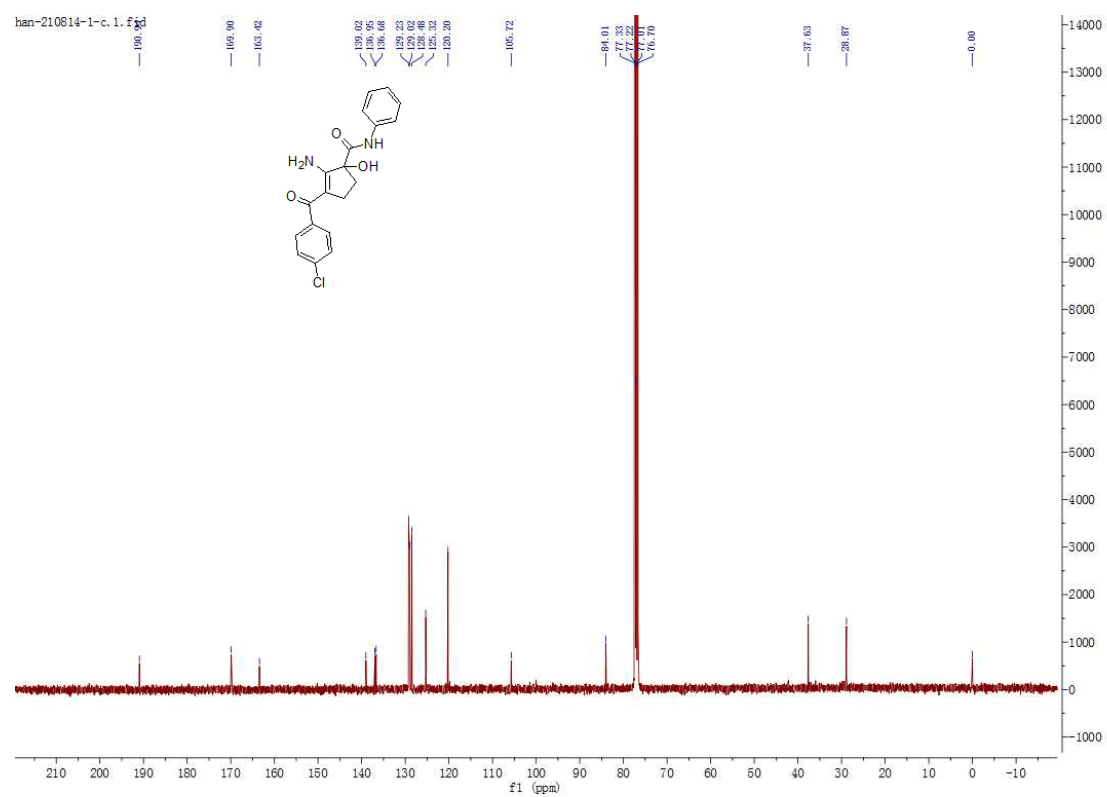

**Figure 15.** <sup>1</sup>H-(upper) and <sup>13</sup>C-NMR (lower) spectra of compound **3af**.



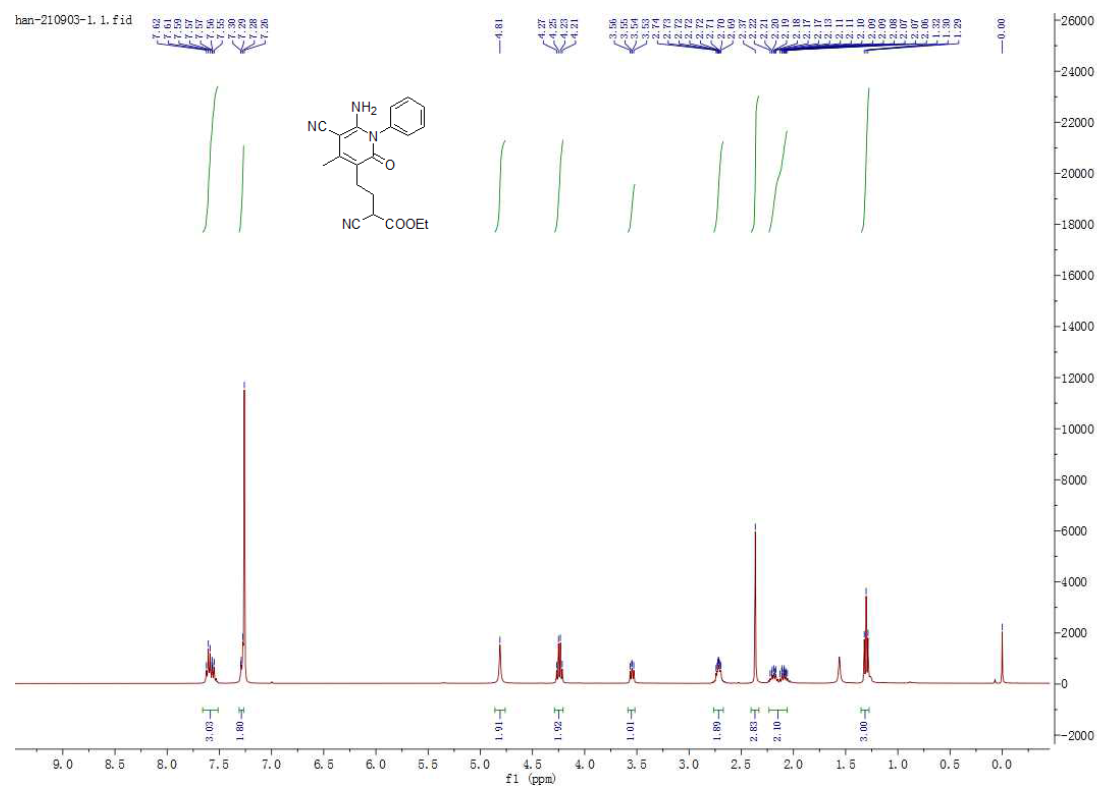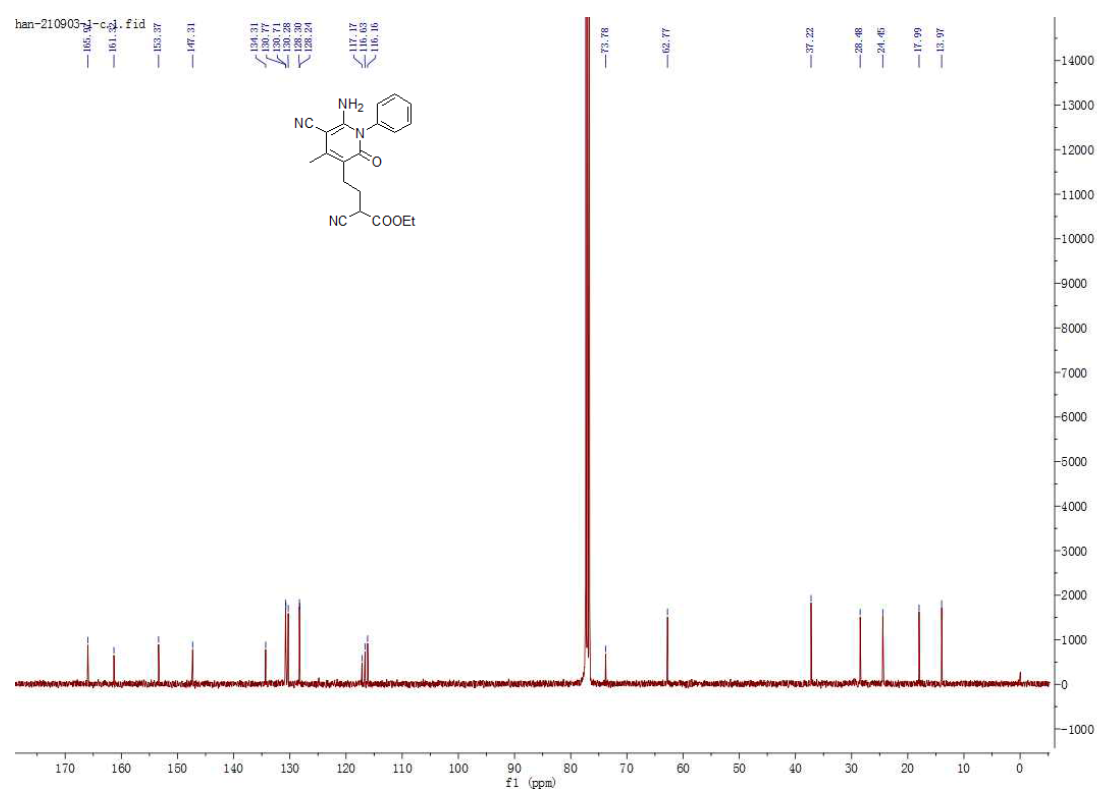

**Figure 17.** <sup>1</sup>H-(upper) and <sup>13</sup>C-NMR (lower) spectra of compound **3ah**.

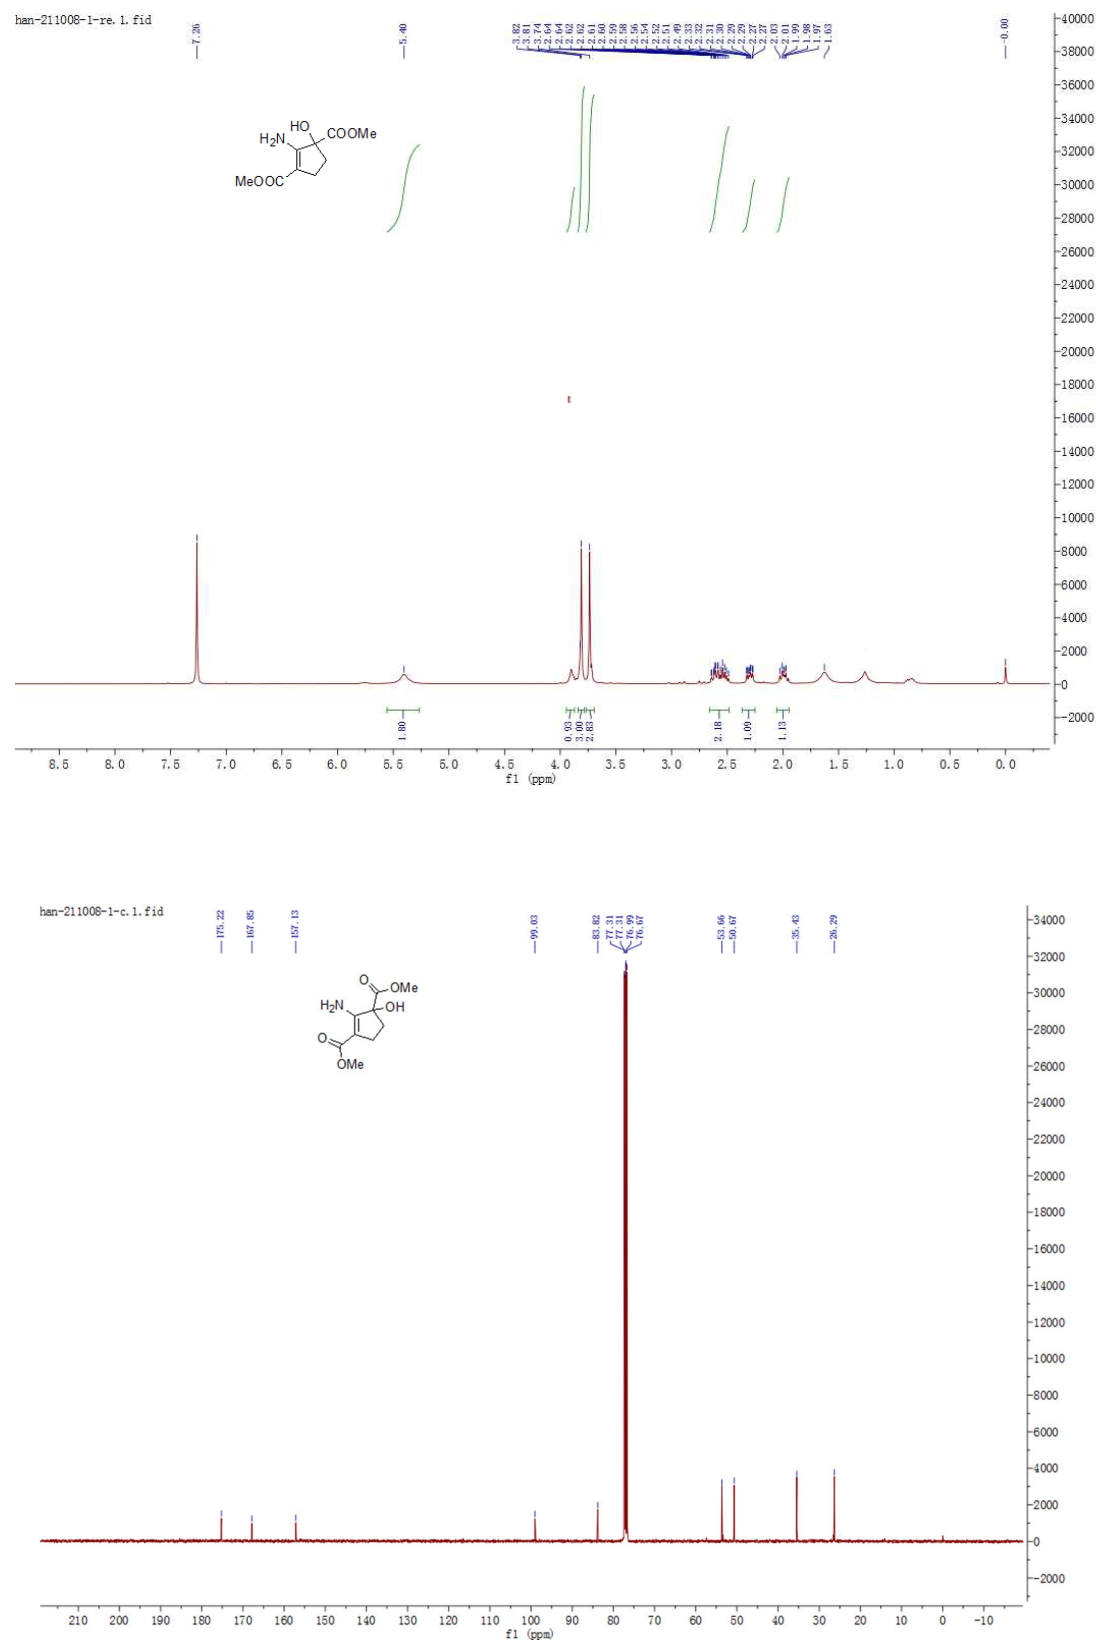

**Figure 18.**  $^1\text{H}$ -(upper) and  $^{13}\text{C}$ -NMR (lower) spectra of compound **31b**.

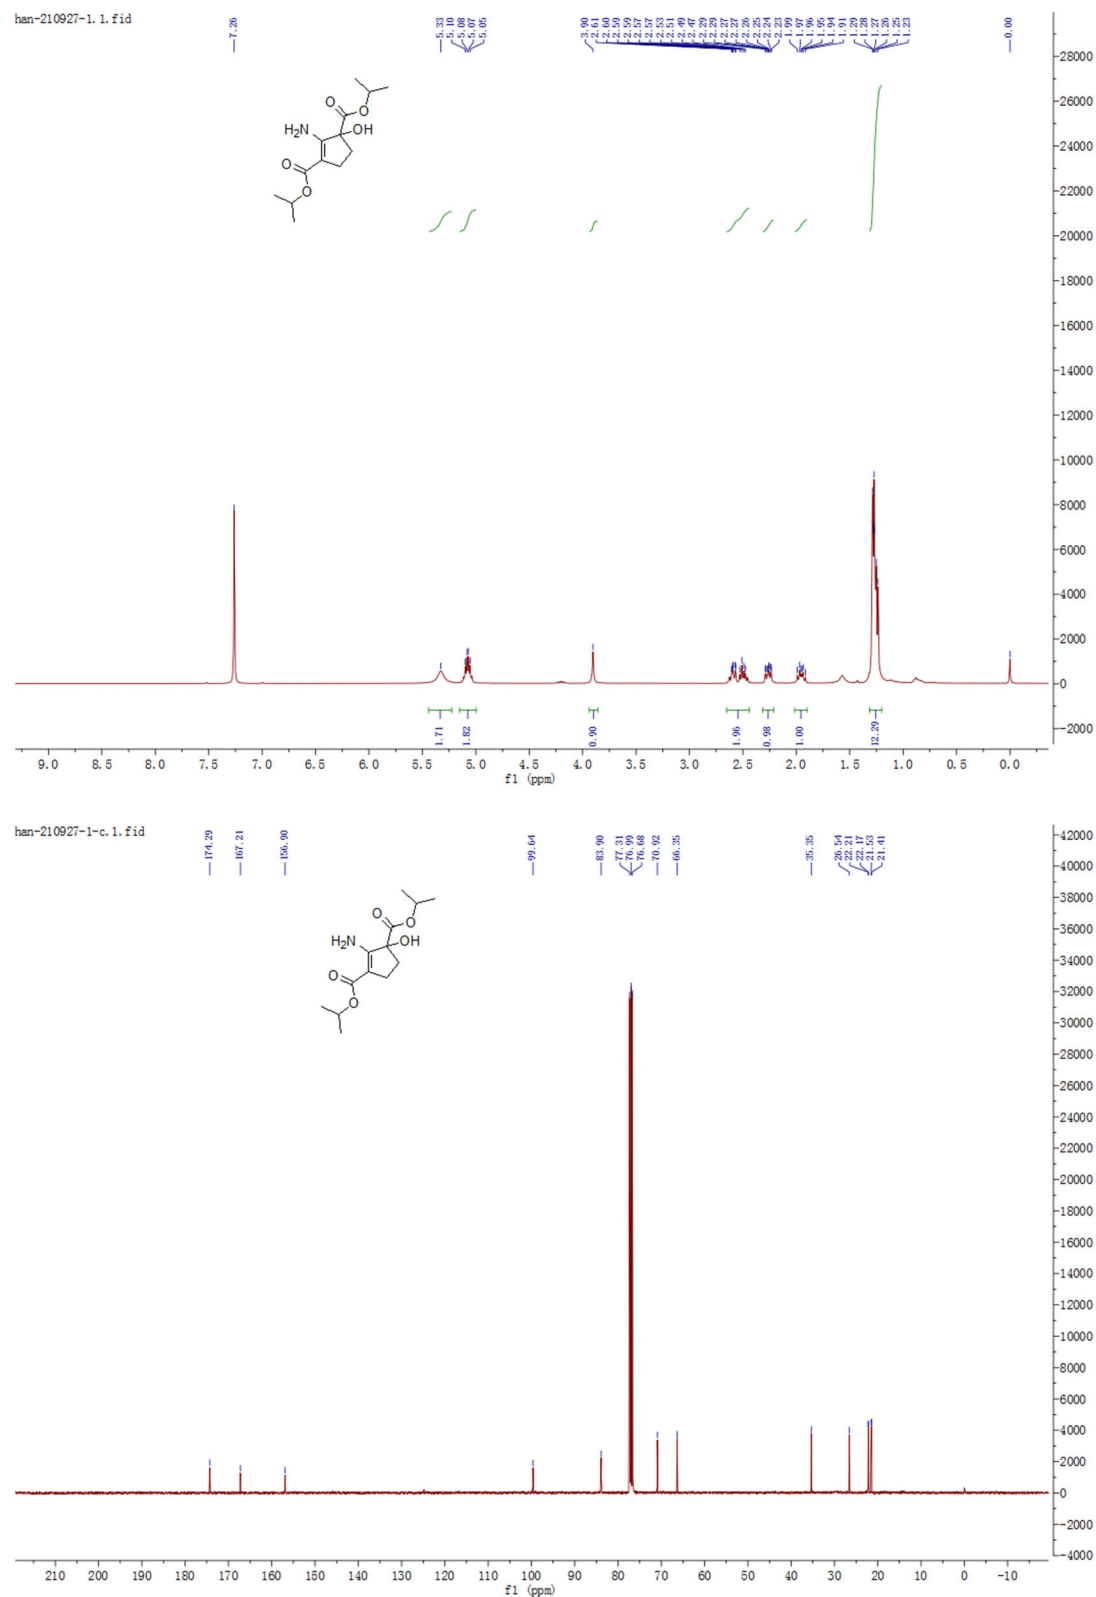

**Figure 19.** <sup>1</sup>H-(upper) and <sup>13</sup>C-NMR (lower) spectra of compound 31c.

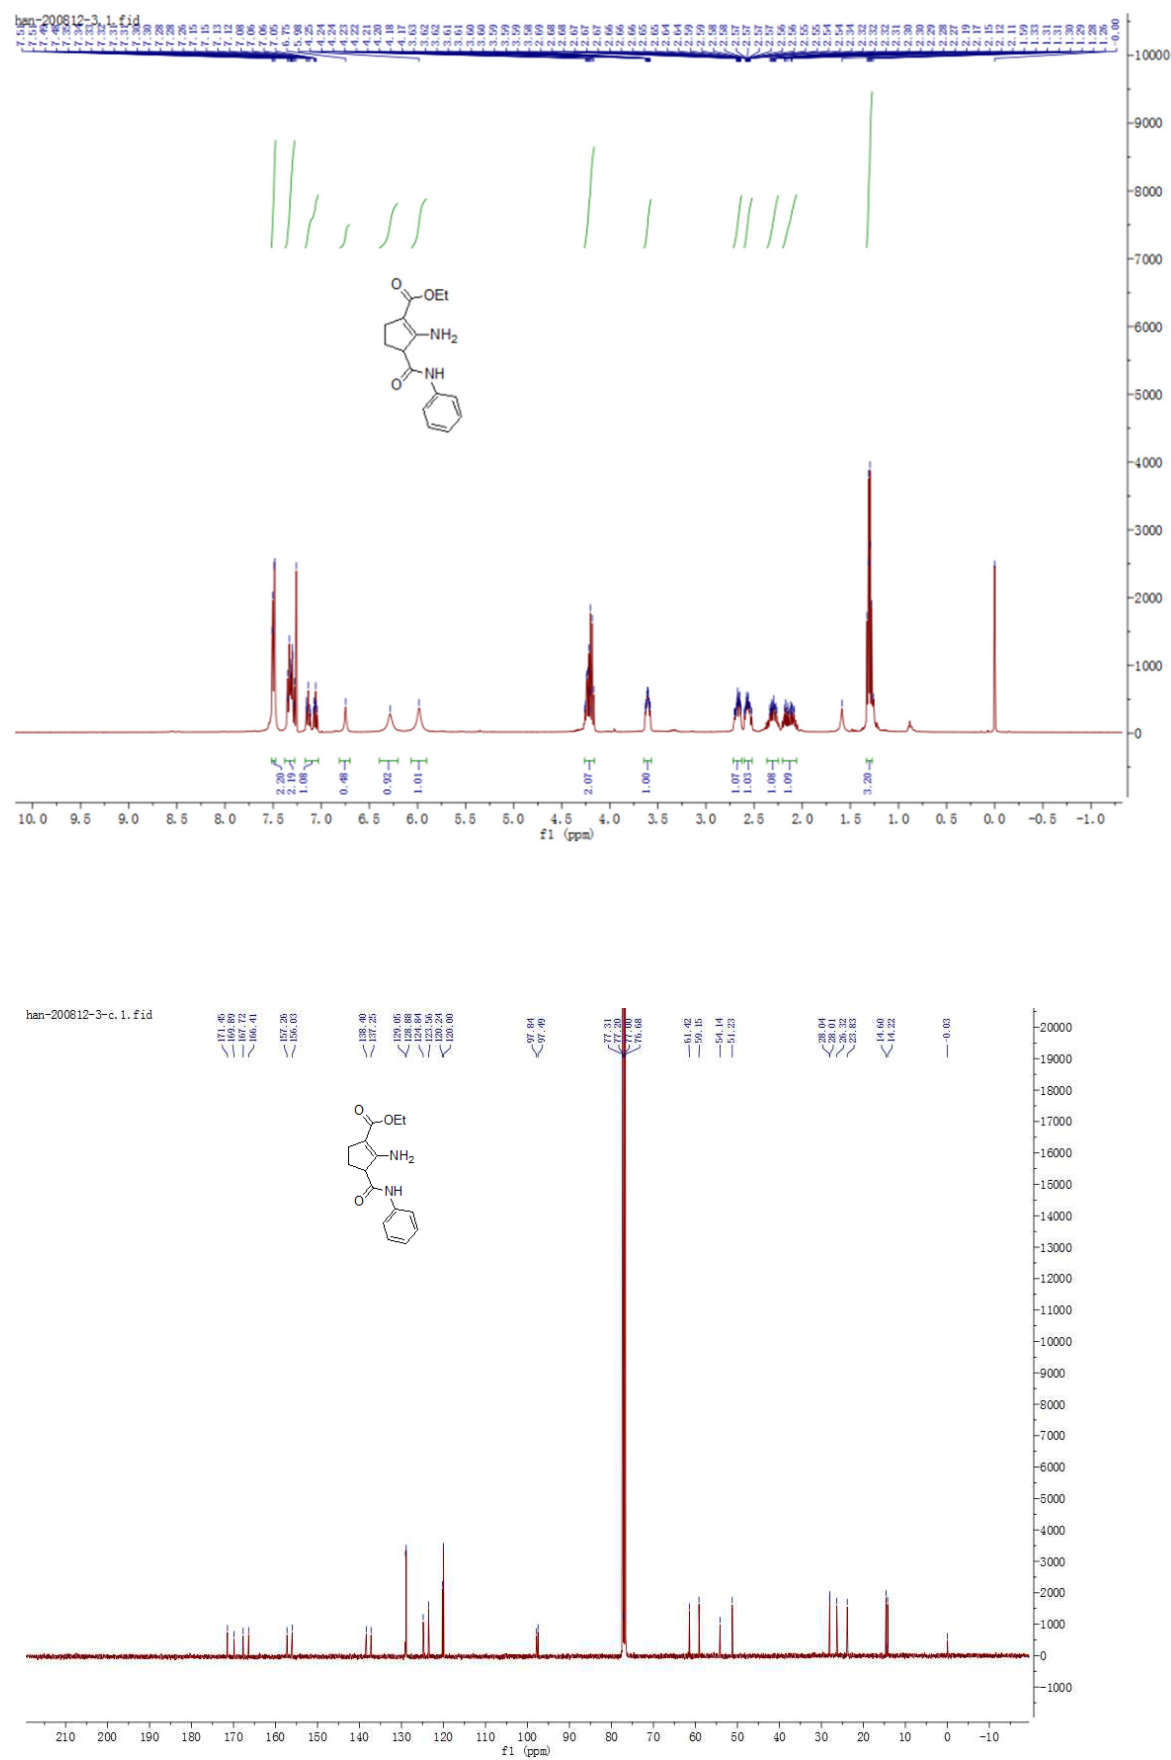

**Figure 20.**  $^1\text{H}$ -(upper) and  $^{13}\text{C}$ -NMR (lower) spectra of compound **4a**.

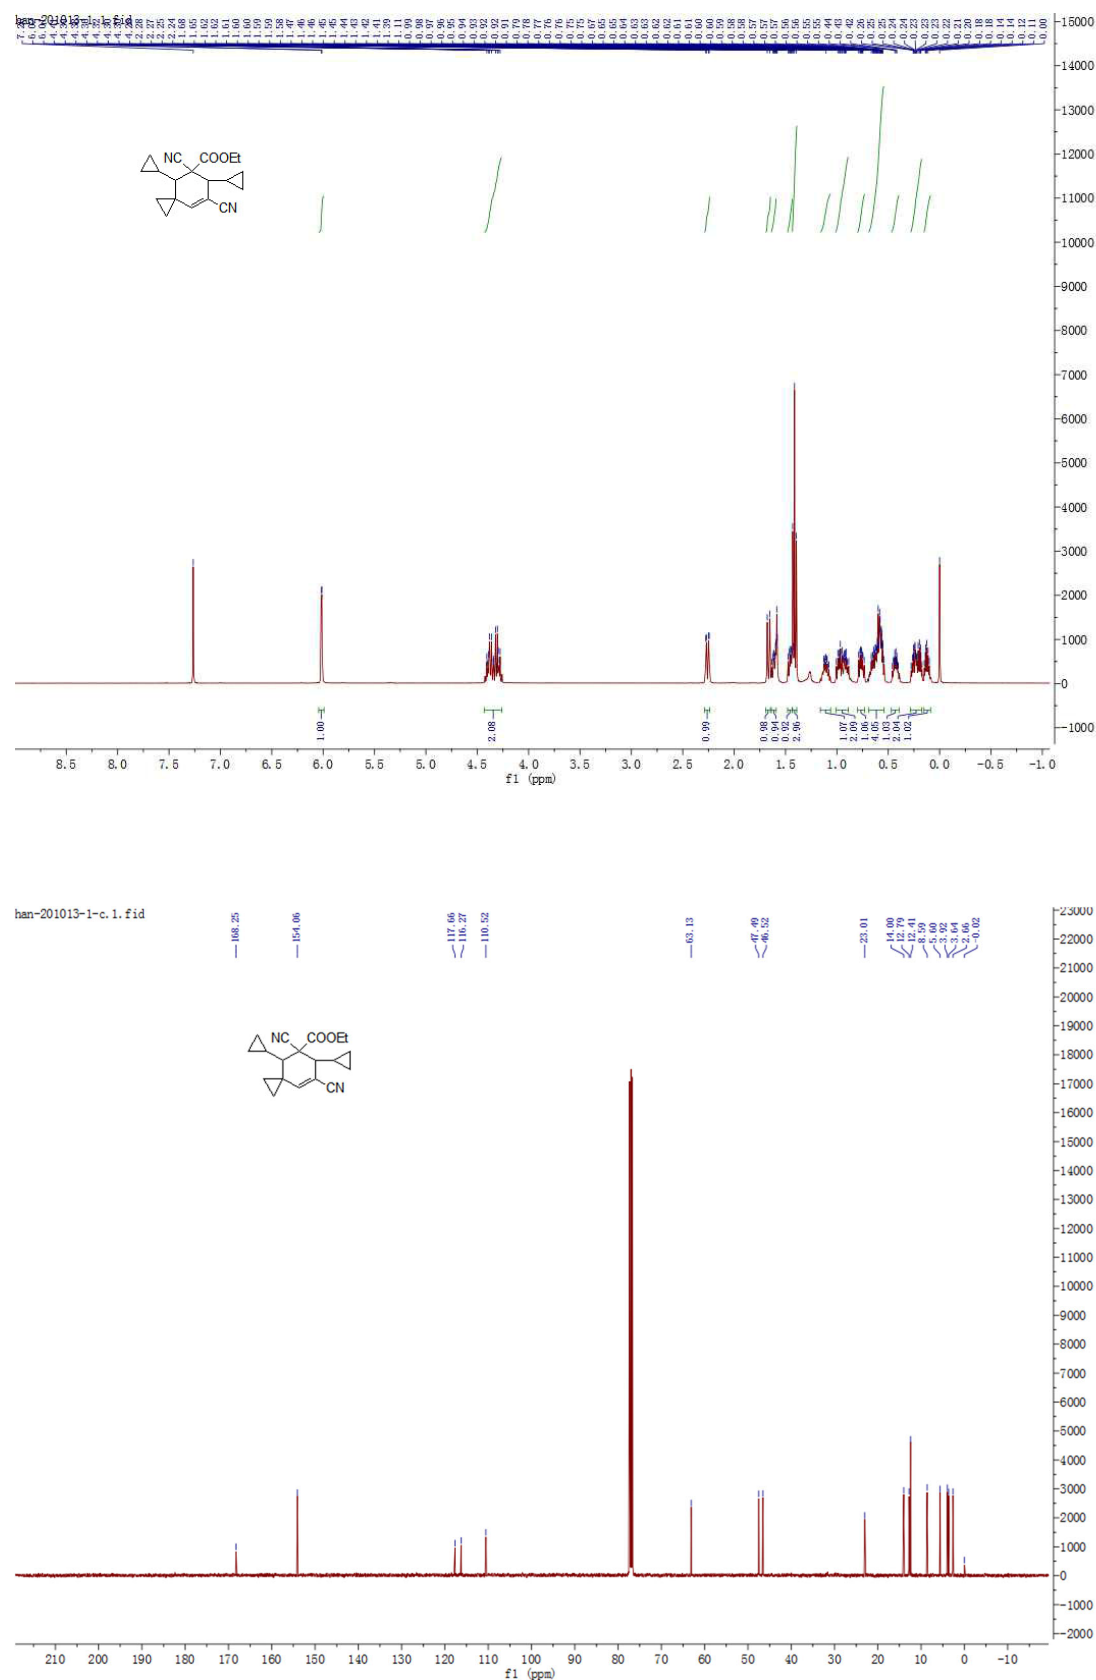

**Figure 21.** <sup>1</sup>H-(upper) and <sup>13</sup>C-NMR (lower) spectra of compound 6a.





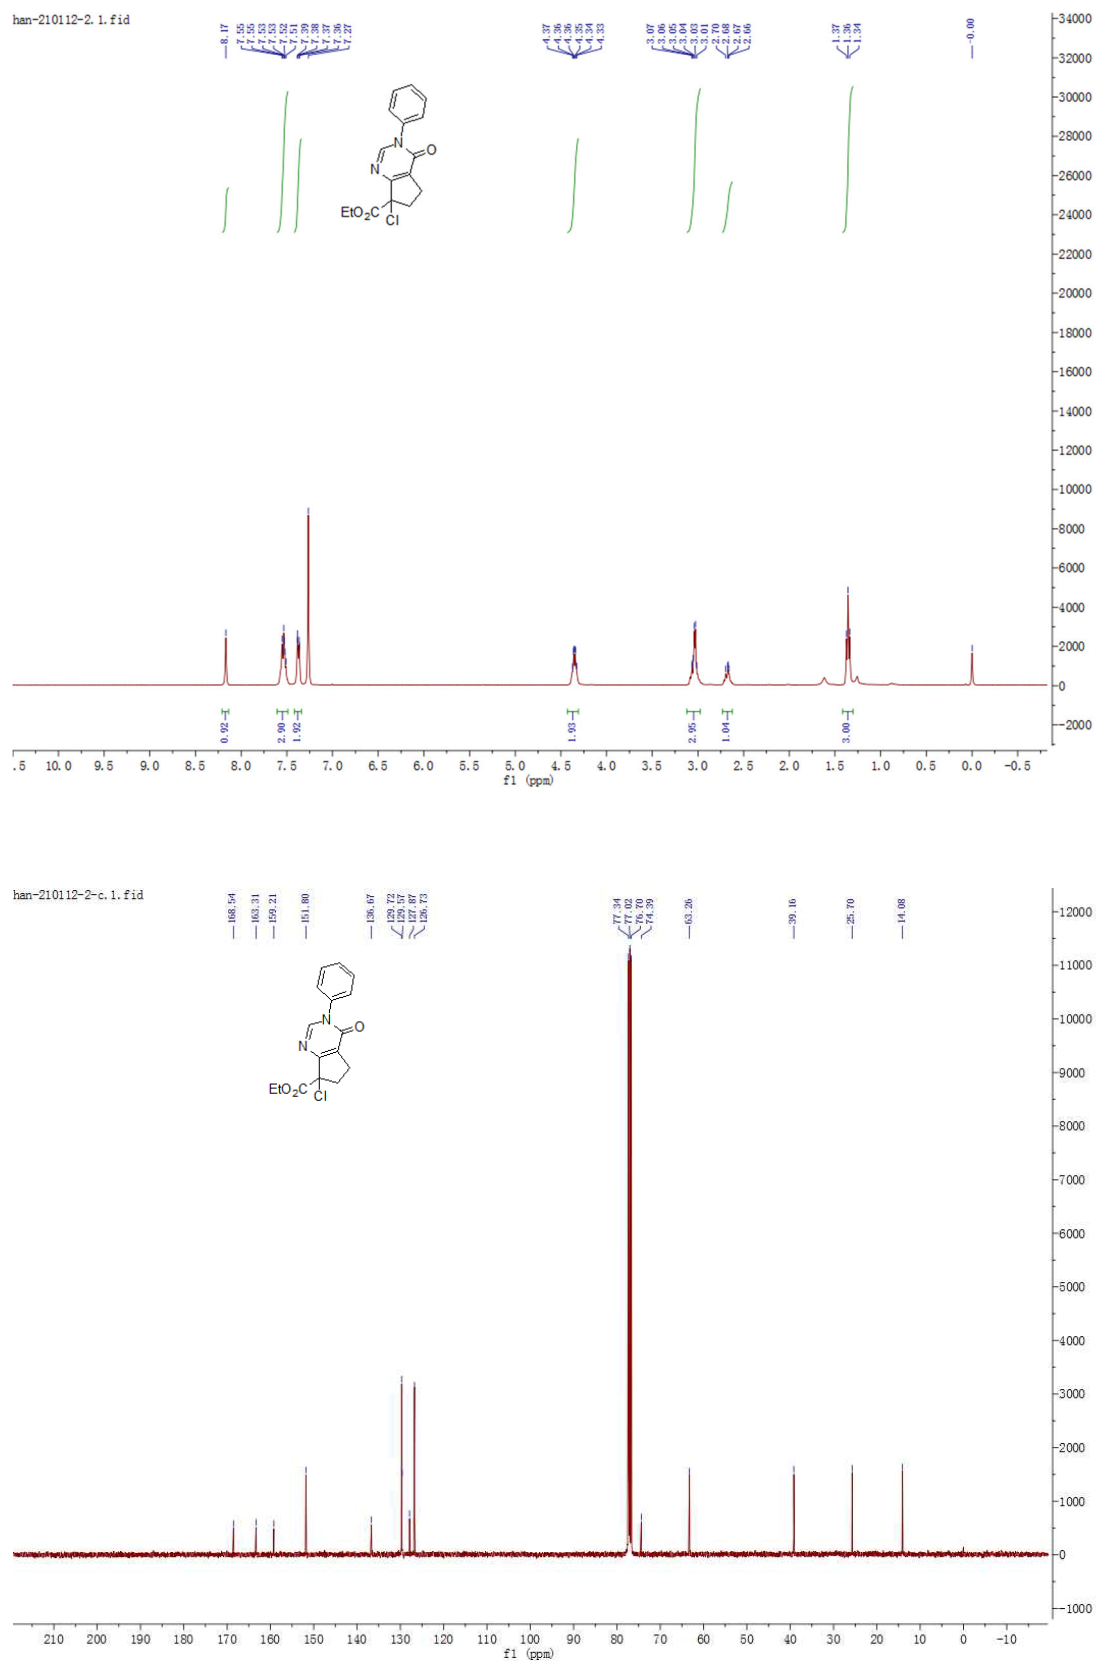

**Figure 23.**  $^1\text{H}$ -(upper) and  $^{13}\text{C}$ -NMR (lower) spectra of compound **8a**.

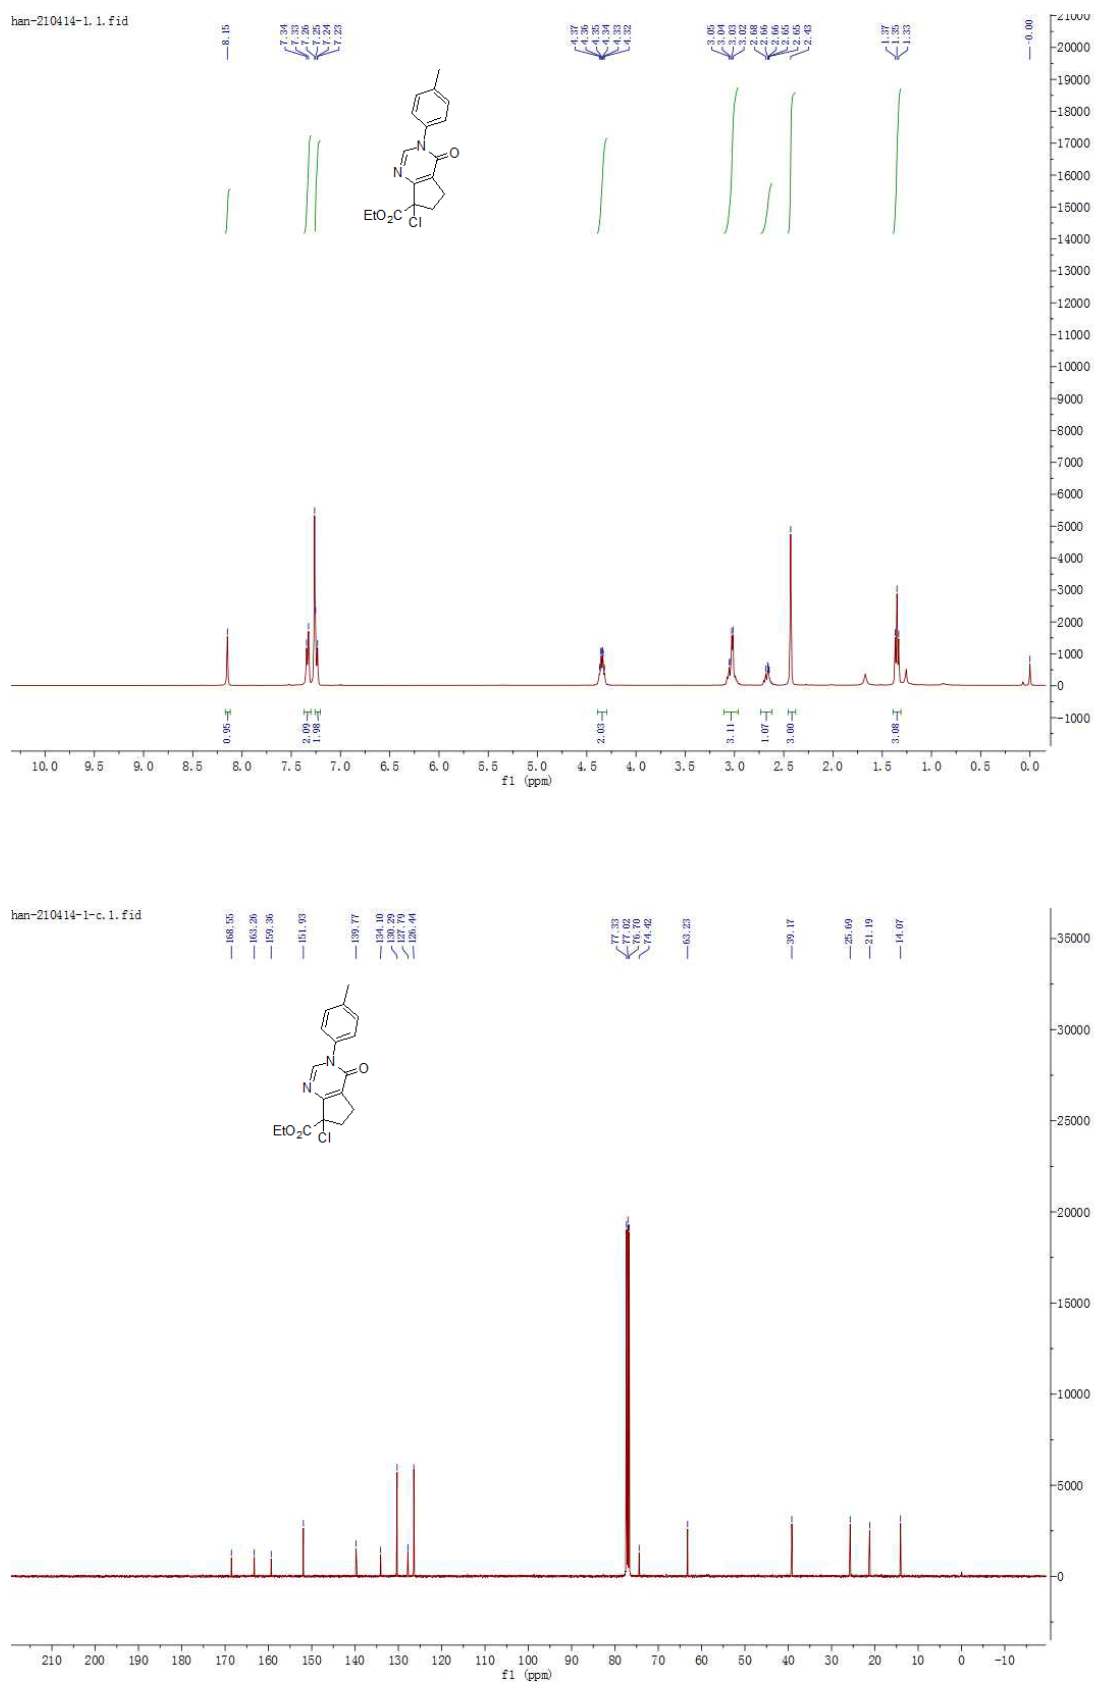

**Figure 24.**  $^1\text{H}$ -(upper) and  $^{13}\text{C}$ -NMR (lower) spectra of compound **8b**.

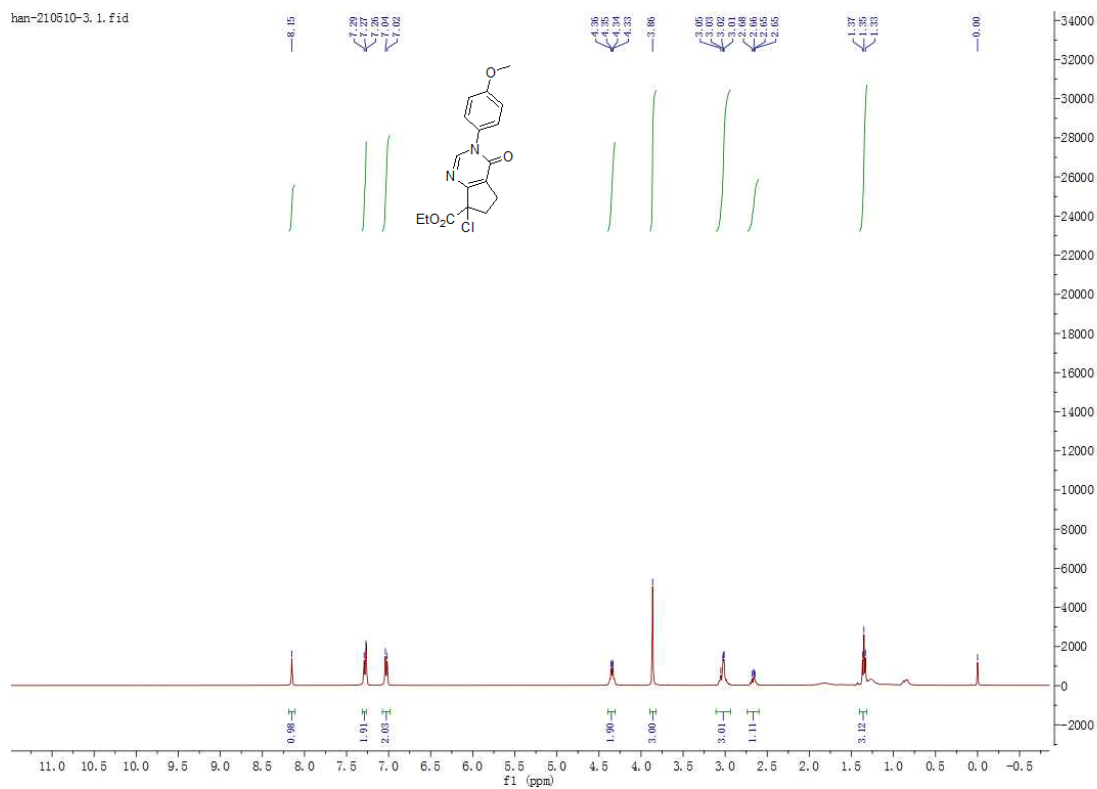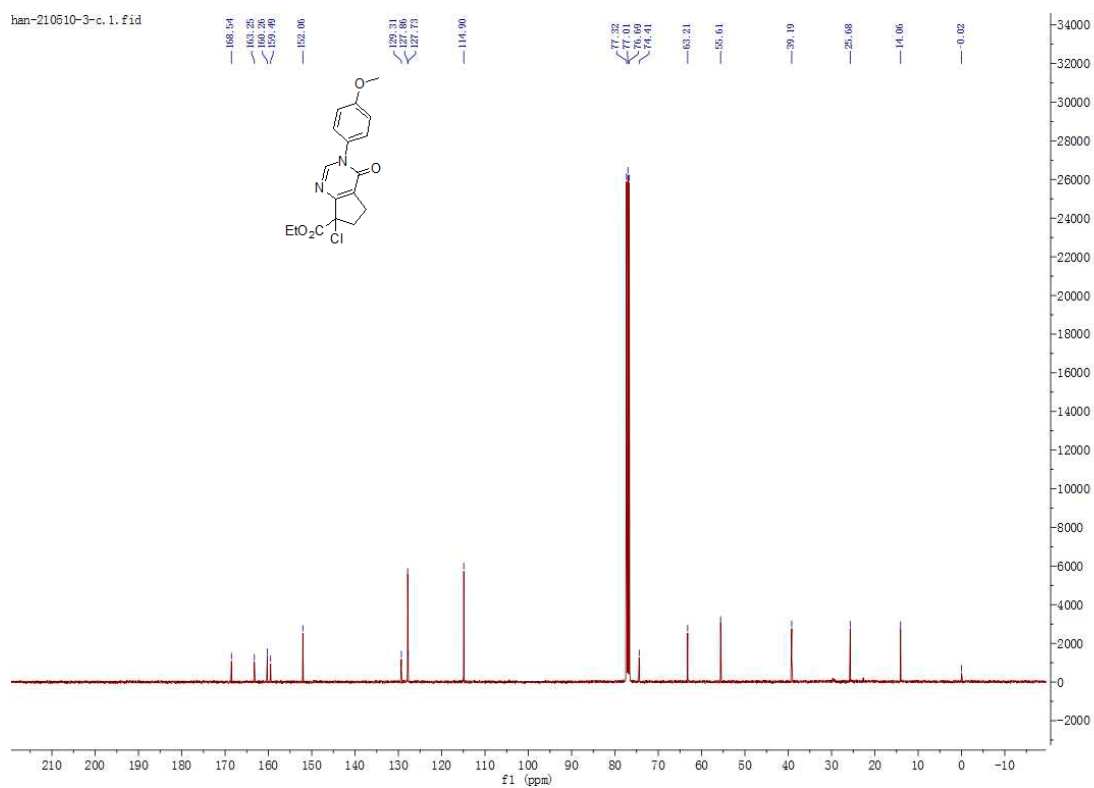

**Figure 25.** <sup>1</sup>H-(upper) and <sup>13</sup>C-NMR (lower) spectra of compound **8c**.

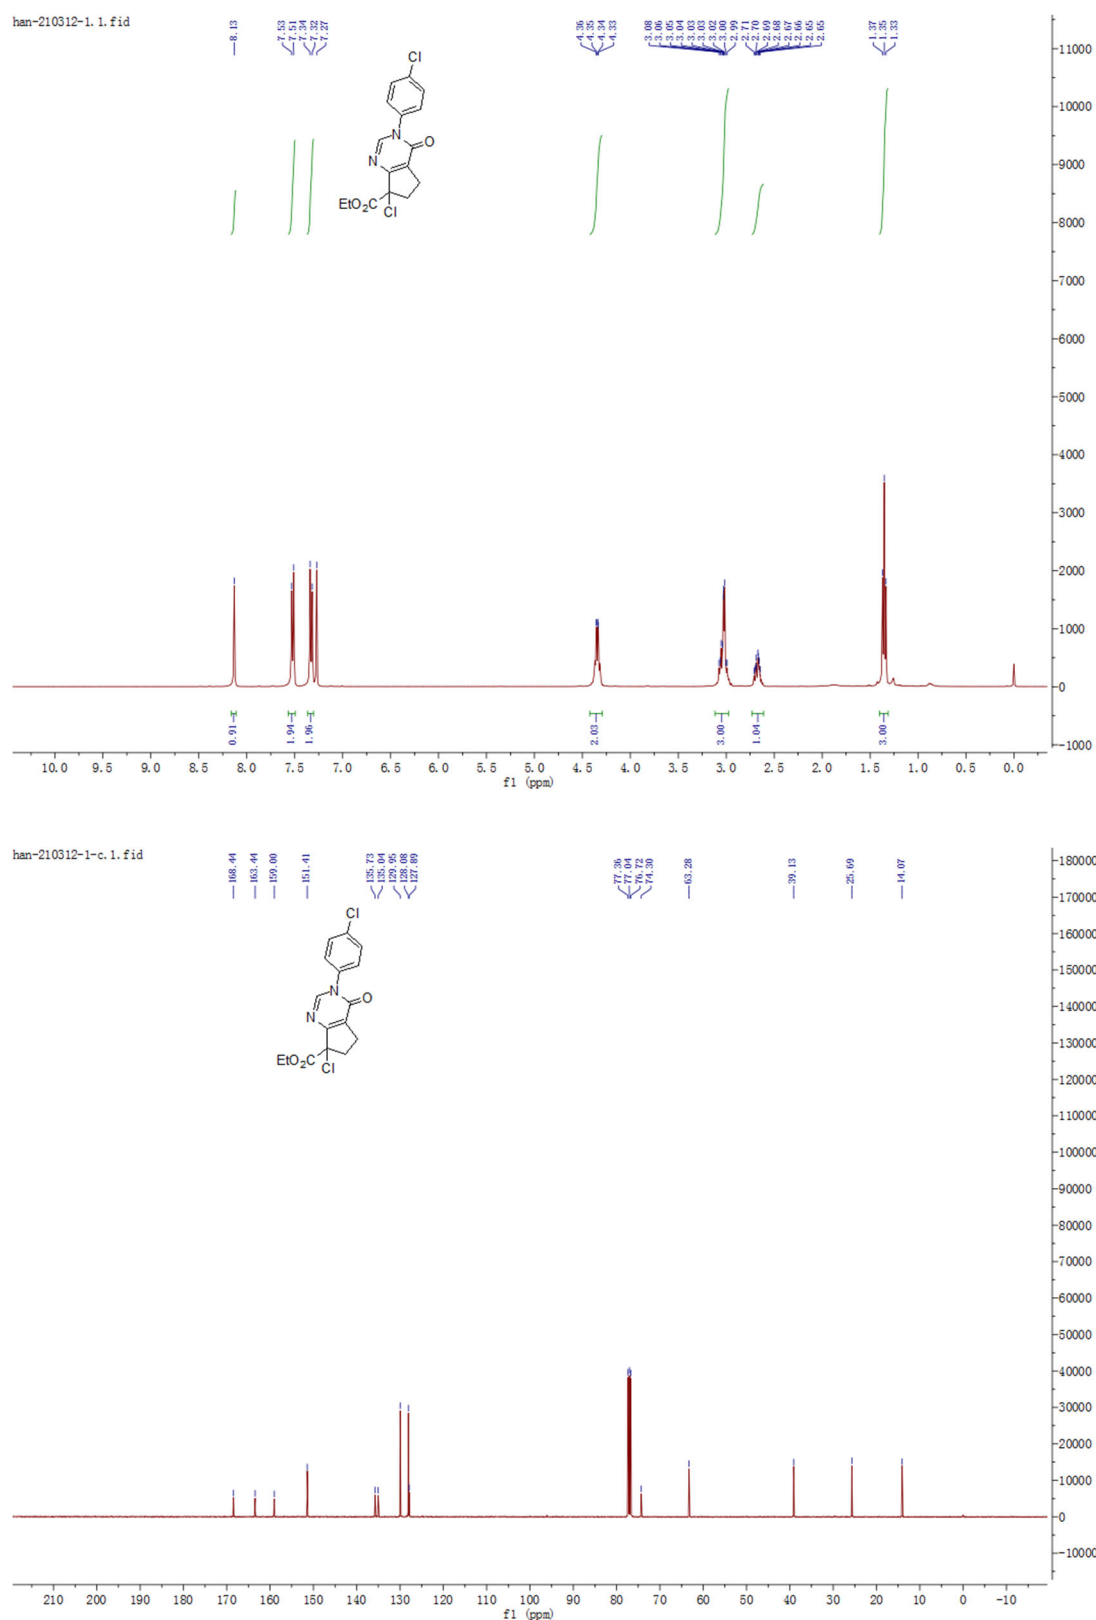

**Figure 26.**  $^1\text{H}$ -(upper) and  $^{13}\text{C}$ -NMR (lower) spectra of compound **8d**.

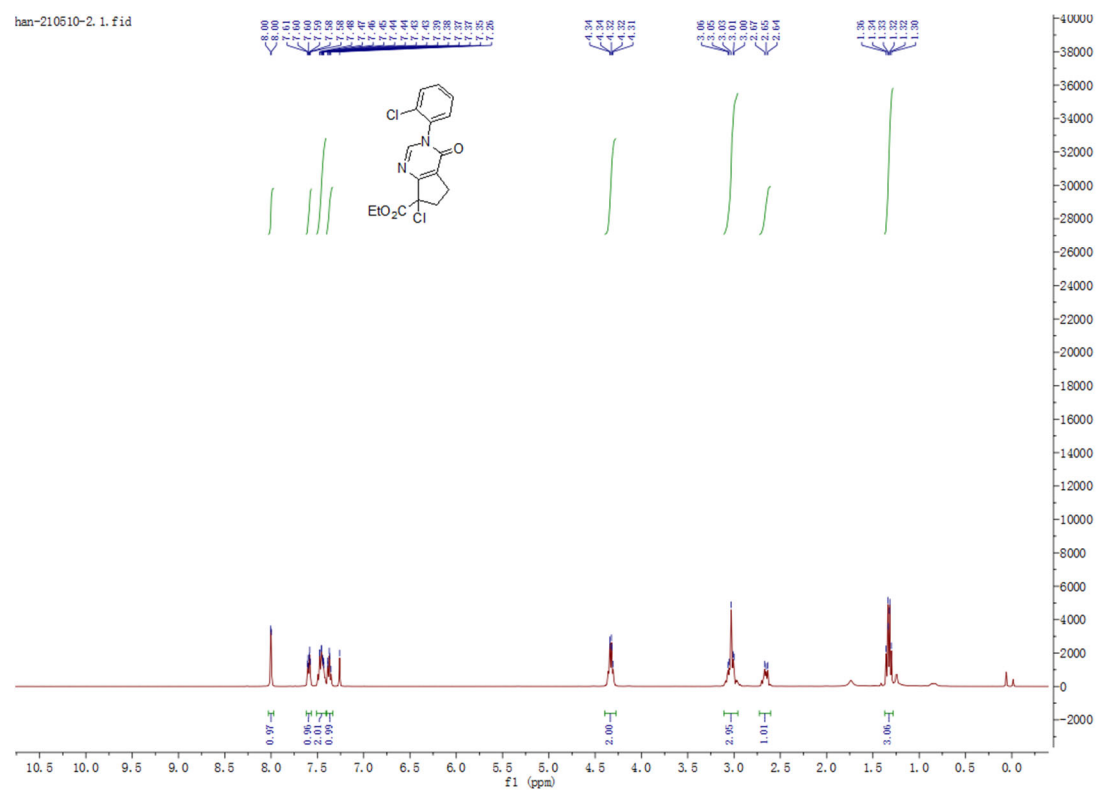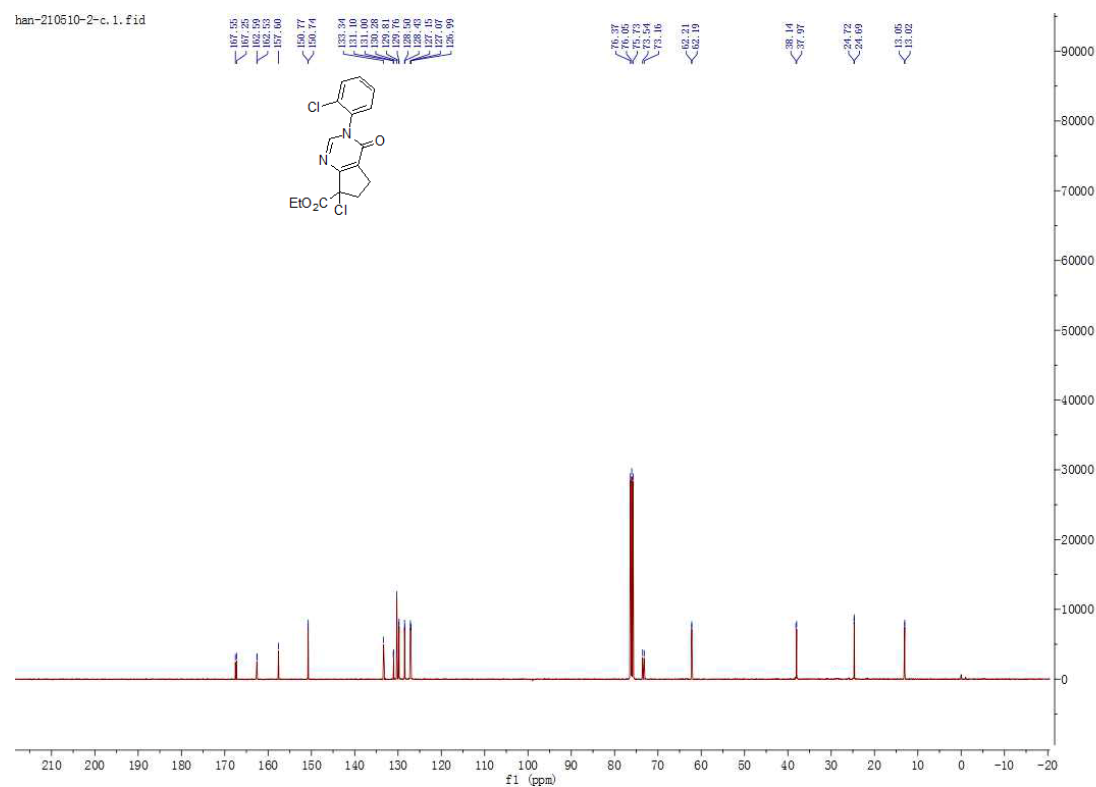

**Figure 27.** <sup>1</sup>H-(upper) and <sup>13</sup>C-NMR (lower) spectra of compound **8f**.

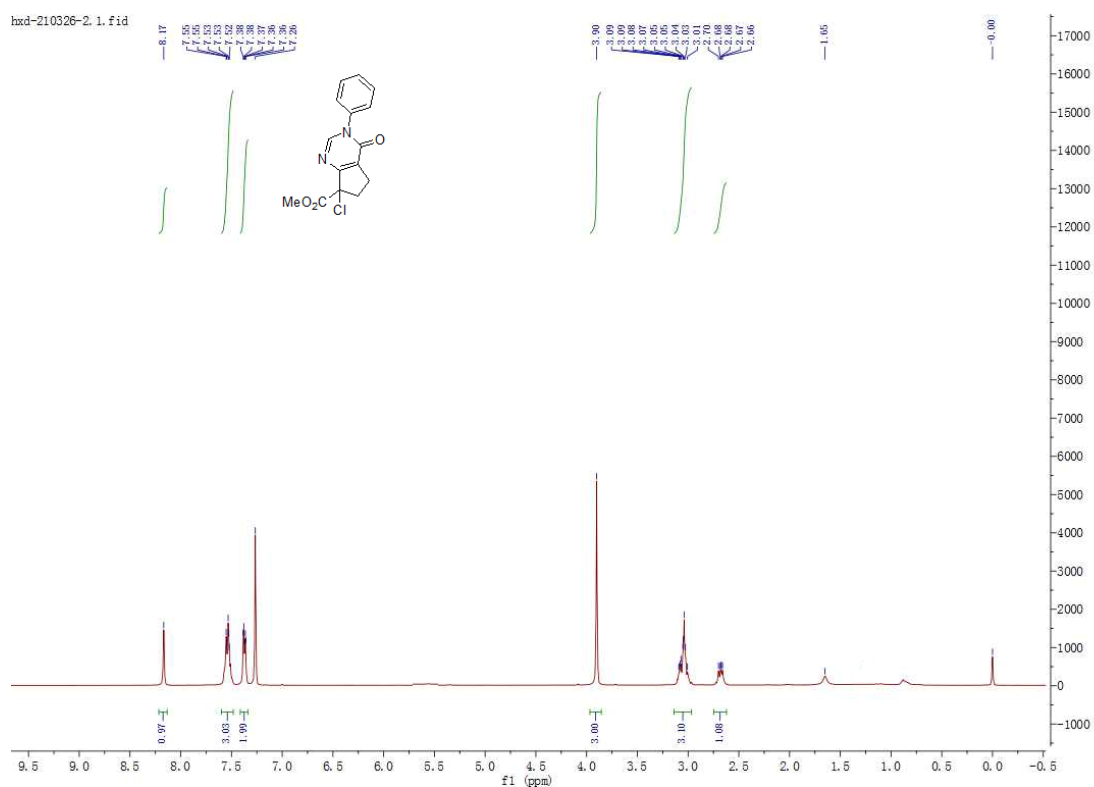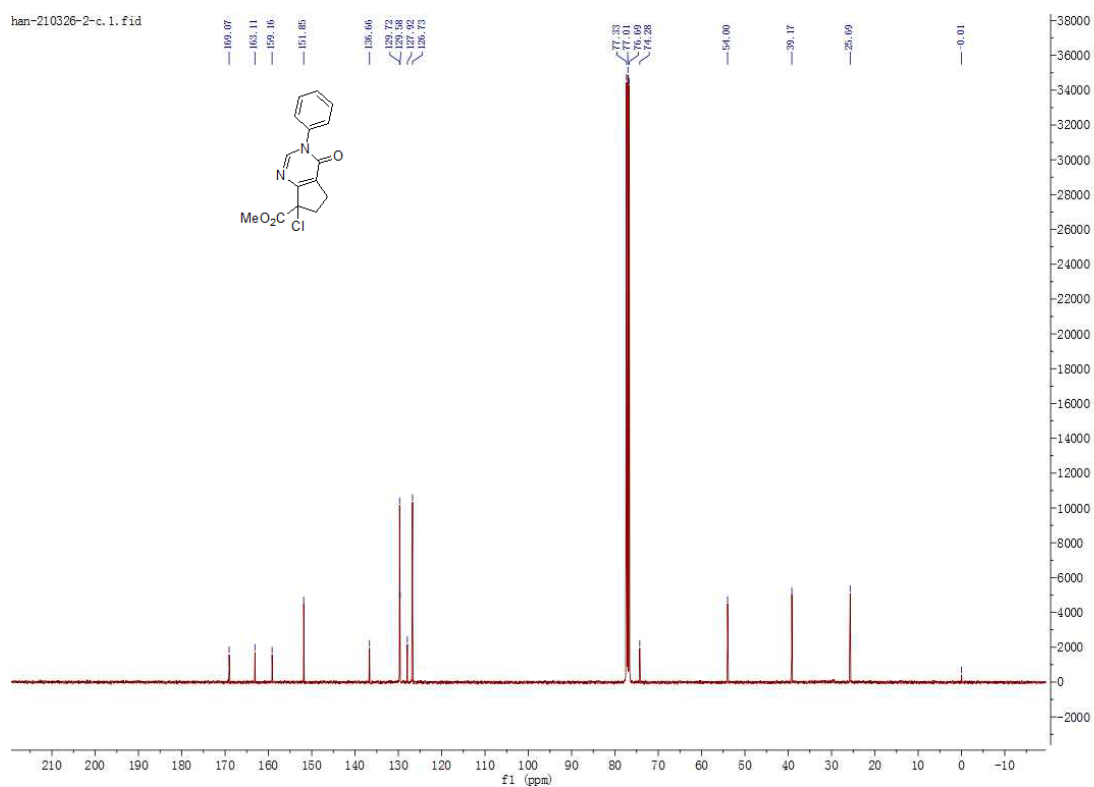

**Figure 28.**  $^1\text{H}$ -(upper) and  $^{13}\text{C}$ -NMR (lower) spectra of compound **8ab**.



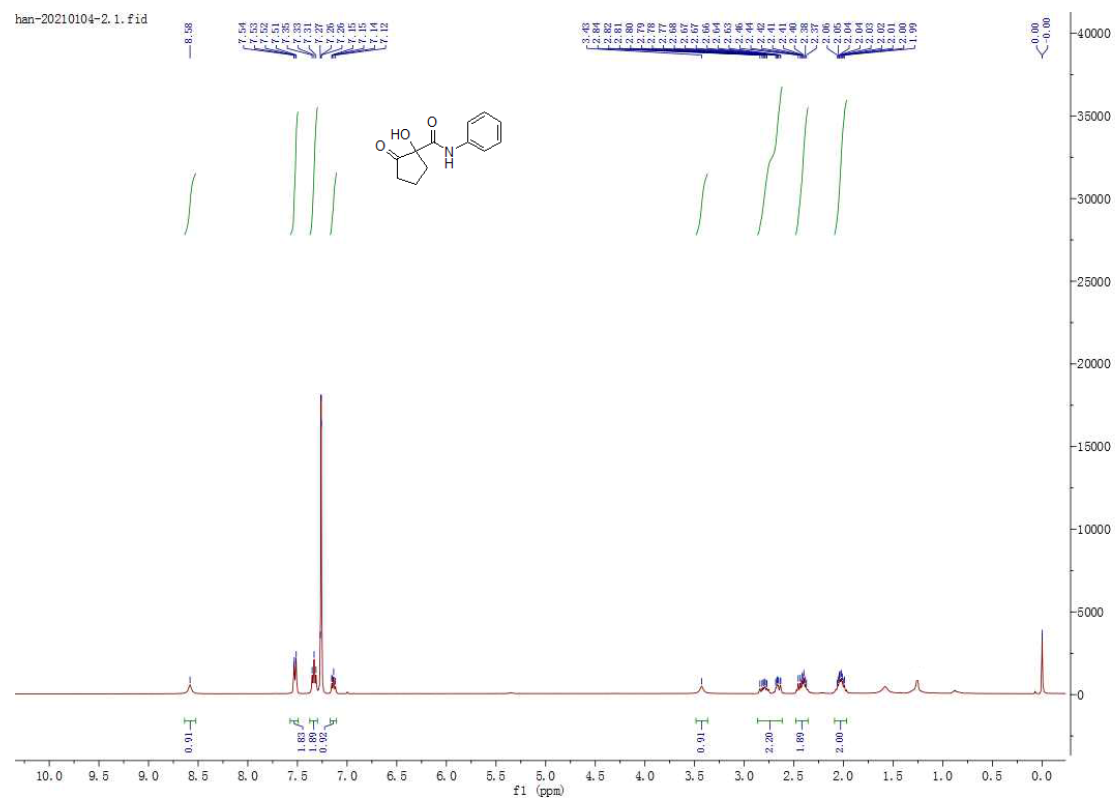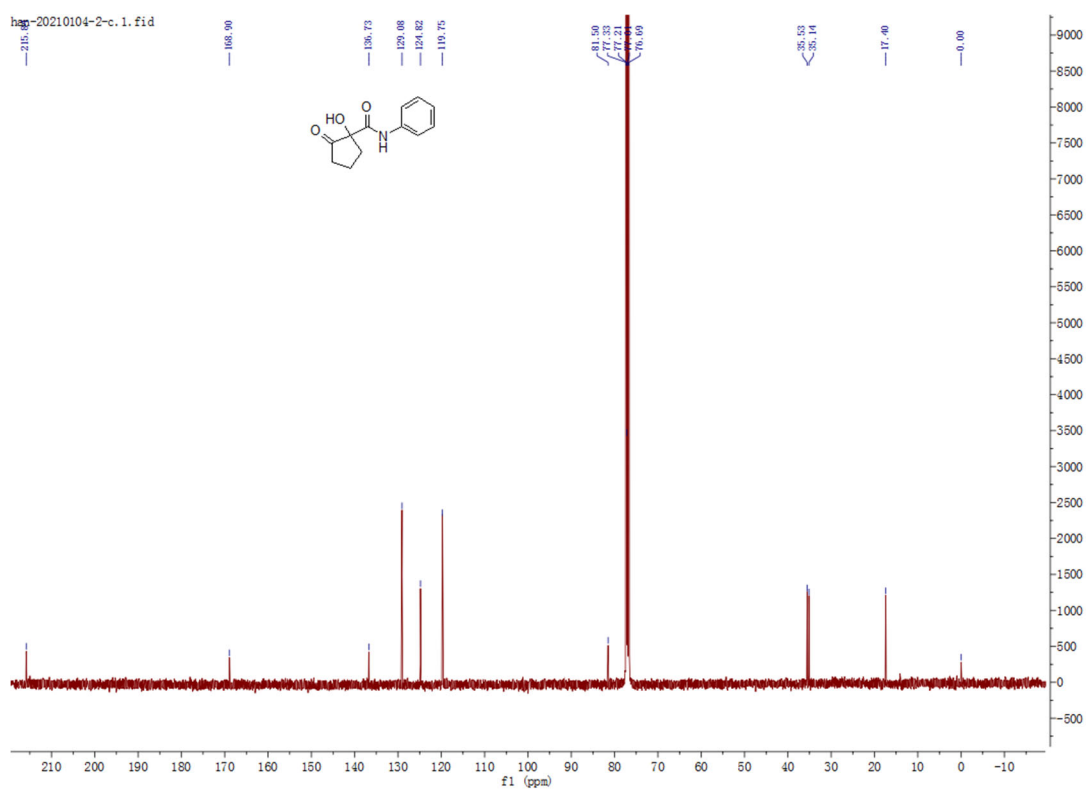

Figure 30. <sup>1</sup>H-(upper) and <sup>13</sup>C-NMR (lower) spectra of compound 9a.



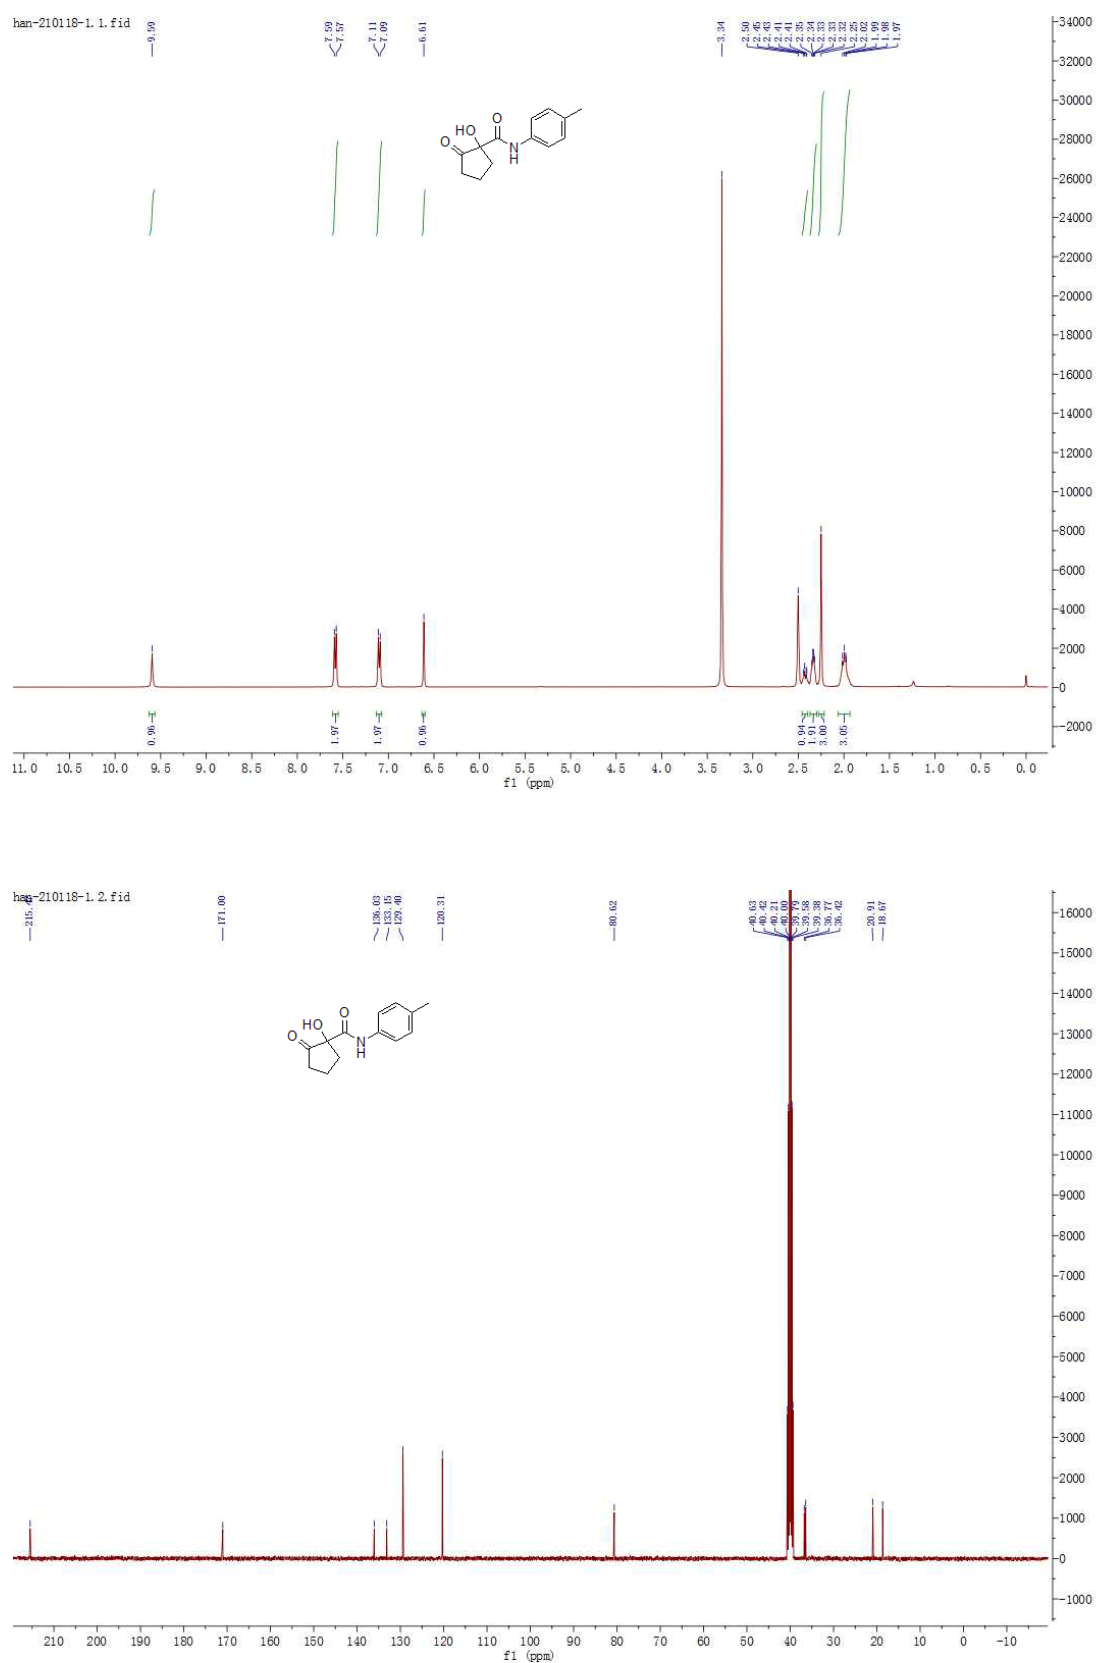

Figure 31. <sup>1</sup>H-(upper) and <sup>13</sup>C-NMR (lower) spectra of compound 9b.
